# Supplementary material for: Facile synthesis of new N-sulfonamidyl-4-thiazolidinone derivatives and their biological evaluation
Source: Royal Society of Chemistry journal article supplement (doi:10.1039/c6nj00021e), 2016-01-01

## Supporting Information

### Facile Synthesis of New *N*-Sulfonamidyl-4-thiazolidinone Derivatives and Biological Evaluation

Dnyaneshwar D. Subhedar,<sup>a</sup> Mubarak H. Shaikh,<sup>a</sup> Firoz A. Kalam Khan,<sup>b</sup> Jaiprakash N. Sangshetti,<sup>b</sup> Vijay M. Khedkar,<sup>c,d</sup> Bapurao B. Shingate\*<sup>a</sup>

<sup>a</sup>*Department of Chemistry, Dr. Babasaheb Ambedkar Marathwada University, Aurangabad, 431 004, India*

<sup>b</sup>*Department of Pharmaceutical Chemistry, Y. B. Chavan College of Pharmacy, Aurangabad, 431 001, India*

<sup>c</sup>*Combichem-Bioresource Centre, National Chemical Laboratory, Pune 411 008, India*

<sup>d</sup>*School of Health Sciences, University of KwaZulu Natal, Westville Campus, Durban 4000, South Africa*

*E-mail: \* [bapushingate@gmail.com](mailto:bapushingate@gmail.com) (B. B. Shingate)*

*\*Corresponding author. Tel.: (91)-240-2403311-12; Fax: (91)-240-2403113*

---

#### Experimental procedure for 4-methylbenzenesulfonohydrazide:

To the stirred solution of 4-methylbenzene-1-sulfonyl chloride (1 mmol) in THF (20 mL), hydrazine hydrate (1.5 mmol) was added dropwise at 0 °C temperature. The progress of the reaction was monitored by Thin Layer Chromatography using *n*-hexane:ethyl acetate (8:2) solvent system. After completion of reaction, mixture was slowly poured into 100 mL of ice water. A solid was formed thereafter. The precipitate was separated by filtration and washed successively with water and crystallized in ethanol to give desired product.

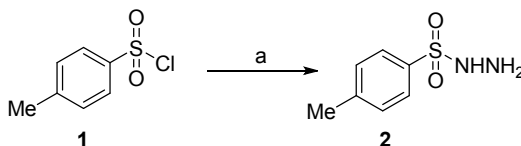

<sup>a</sup>Reagents and conditions: (a) hydrazine, 0 °C, THF.

**Scheme S1:** Synthesis of 4-methylbenzenesulfonohydrazide.

**Table S1.** Optimization of catalyst concentration:

| Entries | Mol % | Solvent      | Time (hr) | Temp (°C) | Yield <sup>a</sup> (%) |
|---------|-------|--------------|-----------|-----------|------------------------|
| 1       | 5     | Solvent free | 4         | 80        | 68                     |
| 2       | 10    | Solvent free | 2.5       | 80        | 79                     |
| 3       | 15    | Solvent free | 1.5       | 80        | 83                     |
| 4       | 20    | Solvent free | 1         | 80        | 90                     |
| 5       | 25    | Solvent free | 1         | 80        | 90                     |

**Reaction conditions:** **1a** (1 mmol), **2** (1 mmol), **3** (1 mmol) at 80 °C for 1 hr. <sup>a</sup>Isolated yield.

**Table S2.** Recycling of the dried IL in the synthesis of 4-methyl-*N*-(4-oxo-2-phenylthiazolidin-3-yl)benzenesulfonamide.<sup>a</sup>

| Entry | Run | Time (hr) | Yield (%) <sup>b</sup> |
|-------|-----|-----------|------------------------|
| 1     | I   | 1         | 90                     |
| 2     | II  | 1         | 90                     |
| 3     | III | 1         | 87                     |
| 4     | IV  | 1         | 86                     |

**<sup>a</sup>Reaction conditions:** **1a** (1 mmol), **2** (1 mmol), **3** (1 mmol) and 20% [HDBU][HSO<sub>4</sub>] at 80 °C. <sup>b</sup>Isolated yield.

**Table S3.** Recycling of the non-dried IL in the synthesis of 4-methyl-*N*-(4-oxo-2-phenylthiazolidin-3-yl)benzenesulfonamide.<sup>a</sup>

| Entry | Run | Time (hr) | Yield (%) <sup>b</sup> |
|-------|-----|-----------|------------------------|
| 1     | I   | 1         | 70                     |
| 2     | II  | 1         | 64                     |
| 3     | III | 1         | 58                     |
| 4     | IV  | 1         | 52                     |

**<sup>a</sup>Reaction conditions:** **1a** (1 mmol), **2** (1 mmol), **3** (1 mmol) and 20% [HDBU][HSO<sub>4</sub>] at 80 °C. <sup>b</sup>Isolated yield.

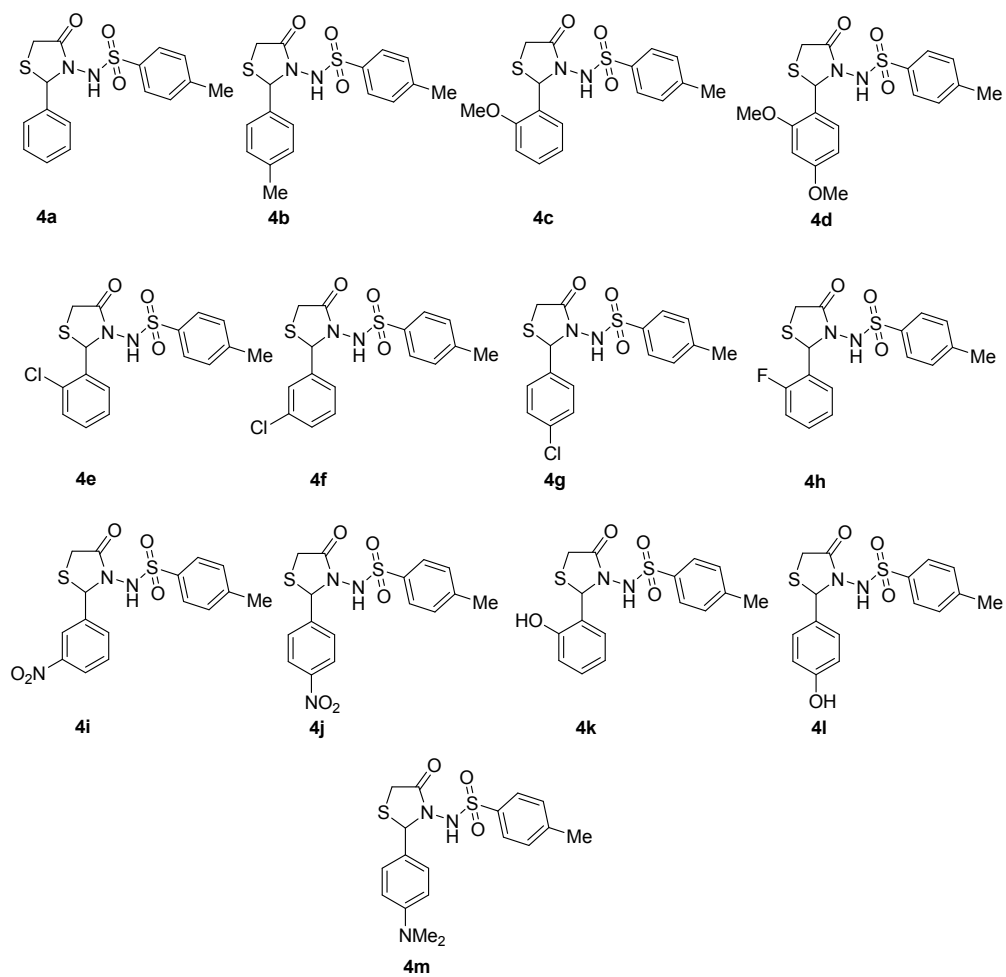

**Figure S1.** Structure of 4-methyl-*N*-(4-oxo-2-phenylthiazolidin-3-yl)benzenesulfonamide derivatives.

**Table S4.** Results of the per-residue interaction analysis for the 4-thiazolidinone derivatives.

| Com<br>p. ID | Docking<br>score | Binding<br>energy | Per-residue interaction energy analysis                                                                                                                                                                                                                                                                    |                               |                           |
|--------------|------------------|-------------------|------------------------------------------------------------------------------------------------------------------------------------------------------------------------------------------------------------------------------------------------------------------------------------------------------------|-------------------------------|---------------------------|
|              |                  |                   | van der Waals<br>(kcal/mol)                                                                                                                                                                                                                                                                                | Electrostatic<br>(kcal/mol)   | $\pi$ - $\pi$<br>stacking |
| <b>4d</b>    | -6.98            | -43.42            | Heme(-3.85), Val461(-2.93), Met460(-1.61), Thr459(-1.01), Cys422(-1.06), Val359(-1.35), Me358(-1.55), Leu356(-3.53), Thr295(-1.20), Ala291(-2.35), Phe290(-2.86), Ala288(-1.21), Ala287(-1.15), Met284(-1.13), Leu208(-1.22), Leu127(-1.32), Tyr116(-3.49), Phe110(-2.04), Met106(-2.15) and Tyr103(-4.70) | Heme(-16.96)                  | Phe110                    |
| <b>4e</b>    | -7.04            | -46.21            | Heme(-2.24), Val461(-1.82), Met460(-2.01), Cys422(-1.72), Val359(-1.18), Met358(-1.11), Leu356(-2.23), Thr295(-1.06), Ala291(-2.38), Phe290(-2.37), Ala288(-1.72), Ala287(-1.29), Met284(-1.17), Leu208(-1.32), Leu130(-0.93), Leu127(-1.57), Phe110(-1.51), Met106(-1.55) and Tyr103(-1.94)               | Heme(-21.78)                  | Tyr103                    |
| <b>4g</b>    | -6.84            | -41.49            | Heme(-2.81), Val461(-1.30), Met460(-1.613), Cys422(-1.42), Val 359(-2.14), Met358(-1.17), Leu356(-1.07), Thr295(-1.41), Ala291(-2.48), Phe290(-1.18), Ala288(-1.35), Ala287(-1.48), Met284(-1.05), Leu208(-1.67), Leu130(-0.81), Leu127(-1.09), Tyr116(-2.73), Phe110(-                                    | Heme(12.57),<br>Tyr116(-1.19) | Tyr116                    |

|           |       |        |                                                                                                                                                                                                                                                                                              |              |                   |
|-----------|-------|--------|----------------------------------------------------------------------------------------------------------------------------------------------------------------------------------------------------------------------------------------------------------------------------------------------|--------------|-------------------|
|           |       |        | 1.55), Met106(-1.40) and Tyr103(-3.61)                                                                                                                                                                                                                                                       |              |                   |
| <b>4h</b> | -7.06 | -48.81 | Heme(-3.46), Val461(-2.12), Met460(-2.02), Cys422(-1.89), Val359(-1.08), Met358(-1.12), Leu356(-1.78), Ala291(-2.01), Phe290(-1.68), Ala288(-1.76), Met284(-1.20), Leu130(-0.95), Leu127(-1.55), Tyr116(-1.68), Phe110(-1.73), Met106(-1.33) and Tyr103(-1.78)                               | Heme(-23.30) | Tyr103            |
| <b>4k</b> | -7.02 | -45.81 | Heme(-2.67), Val461(-1.80), Met460(-2.00), Cys422(-1.77), Val359(-1.02), Met358(-1.01), Leu356(-2.79), Thr295(-1.33), Ala291(-2.40), Phe290(-1.46), Ala288(-1.79), Met284(-1.24), Leu208(-1.00), Leu130(-0.89), Leu127(-1.62), Tyr116(-4.63), Phe110(-1.31), Met106(-1.40) and Tyr103(-1.11) | Heme(-18.78) | Tyr103 and Tyr116 |

#### 4a. FT-IR

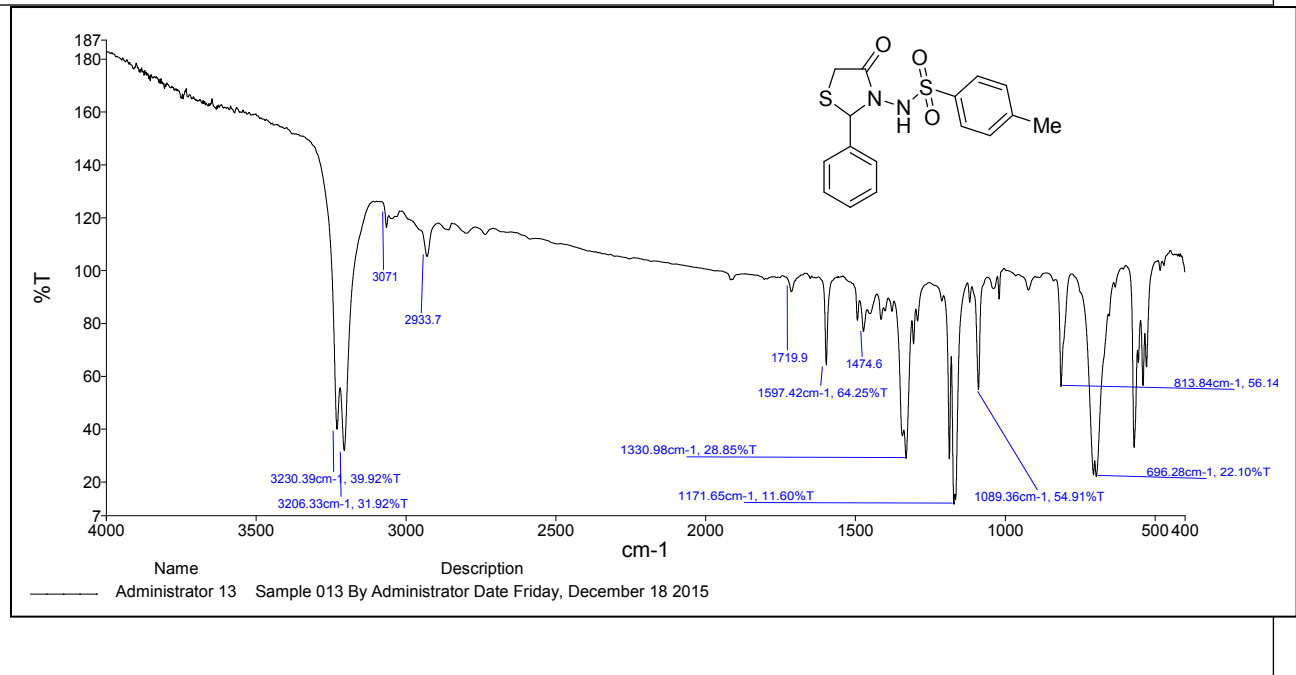

#### 4a. HRMS

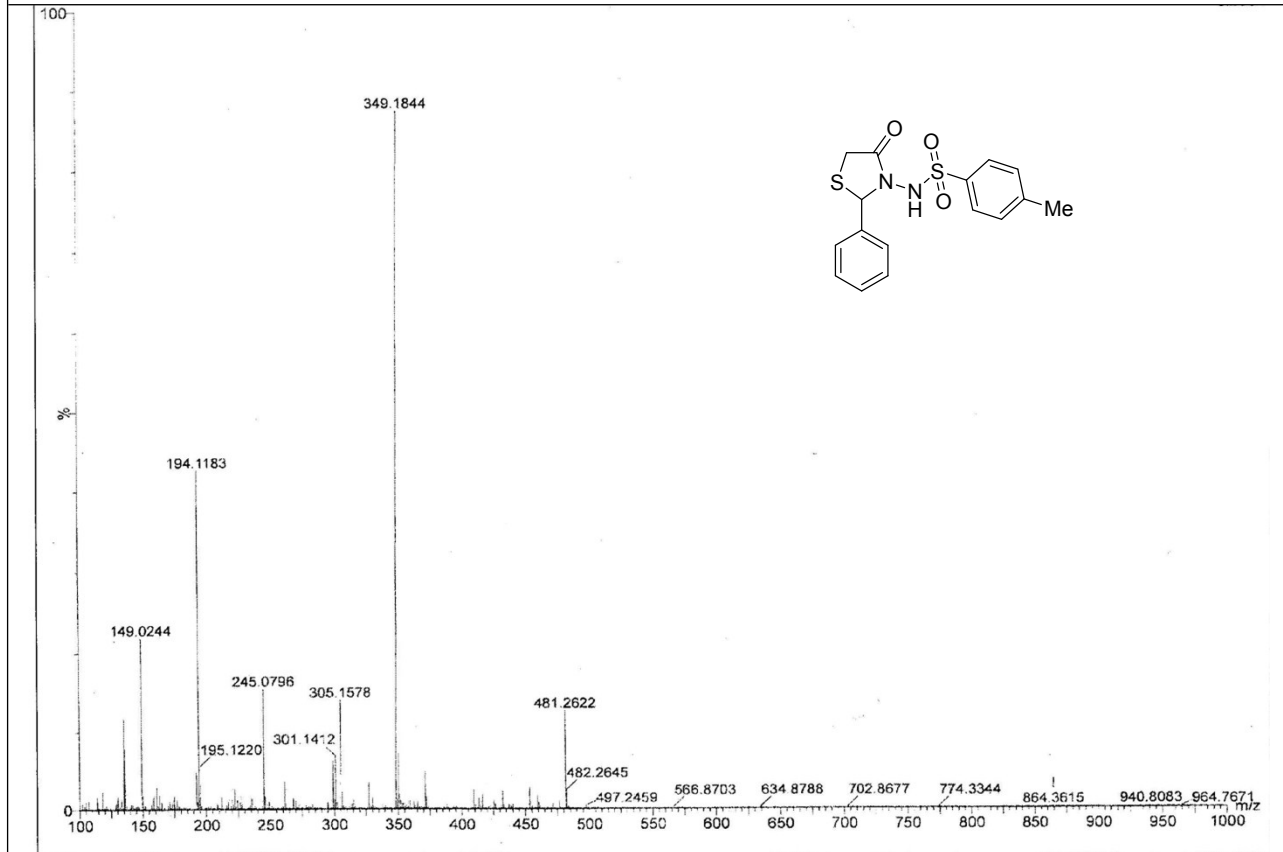

4a. <sup>1</sup>H NMR, 400 MHz, DMSO-d<sub>6</sub>

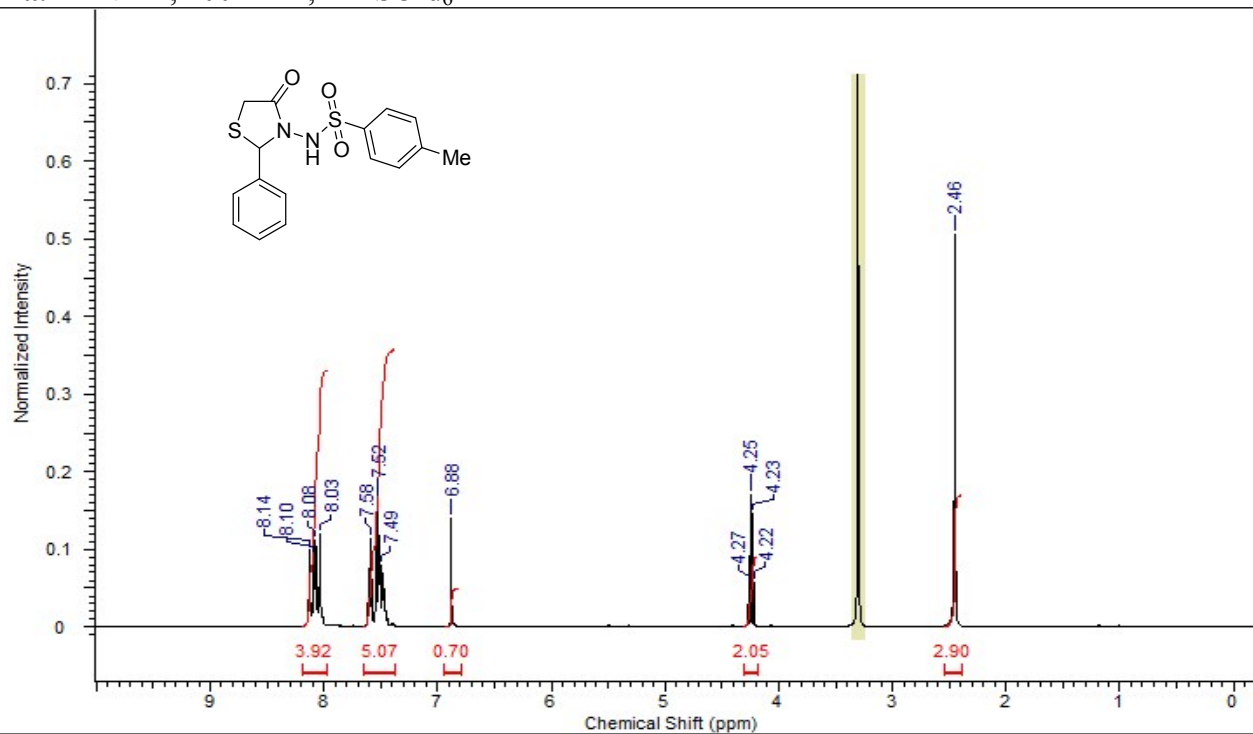

4a. <sup>13</sup>C NMR, 100 MHz, DMSO-d<sub>6</sub>

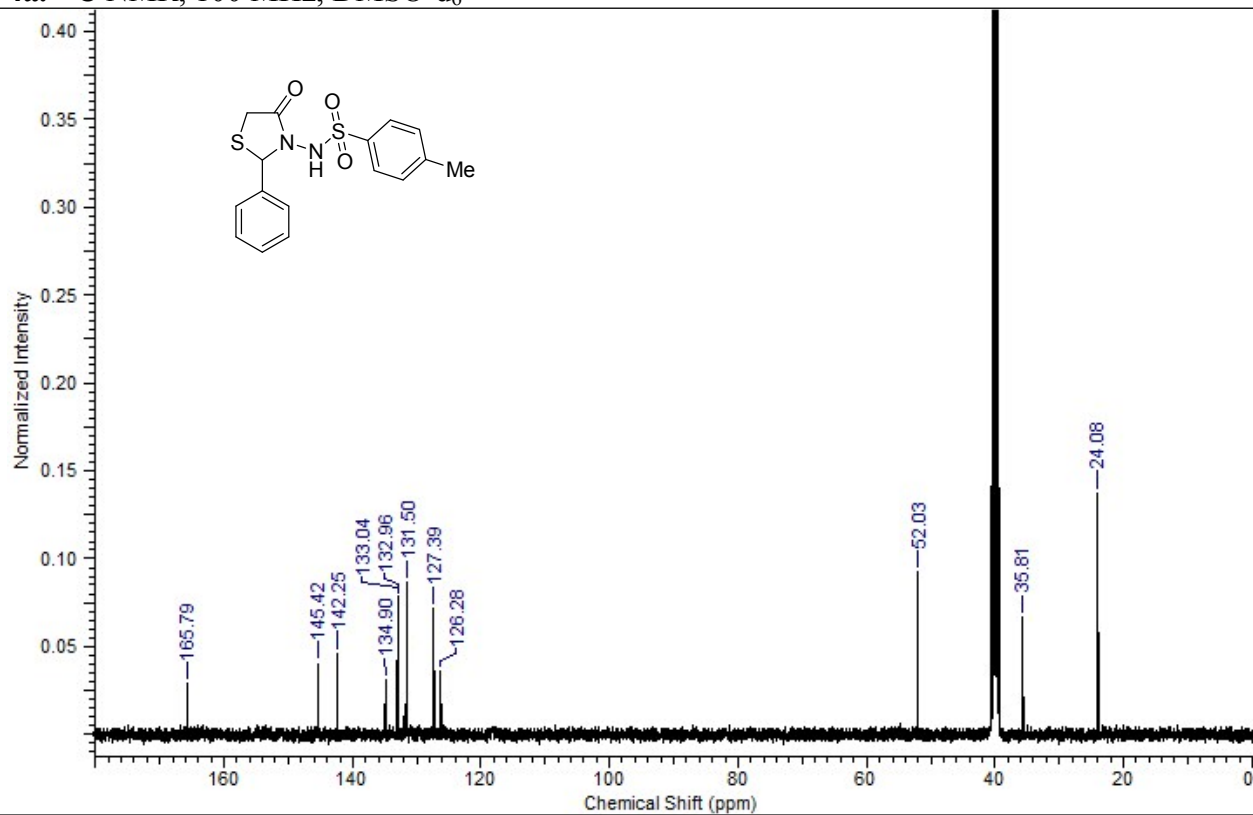

#### 4b. FT-IR

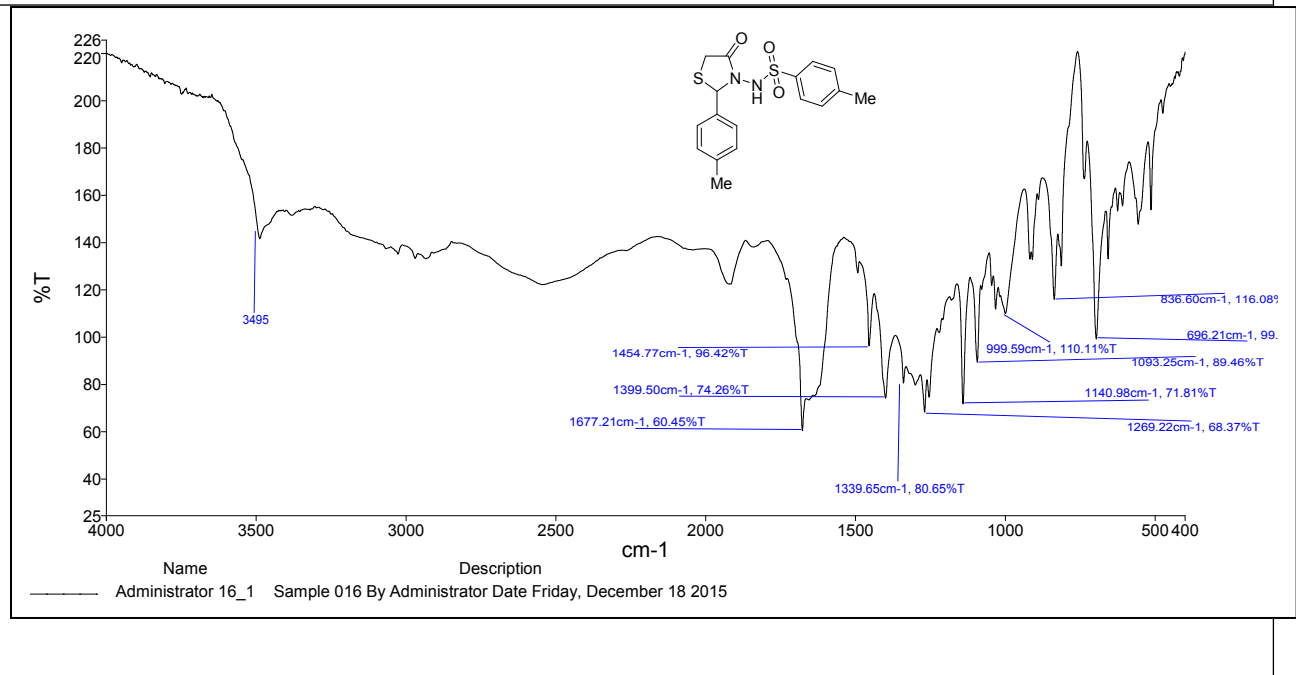

#### 4b. <sup>1</sup>H NMR, 400 MHz, DMSO-d<sub>6</sub>

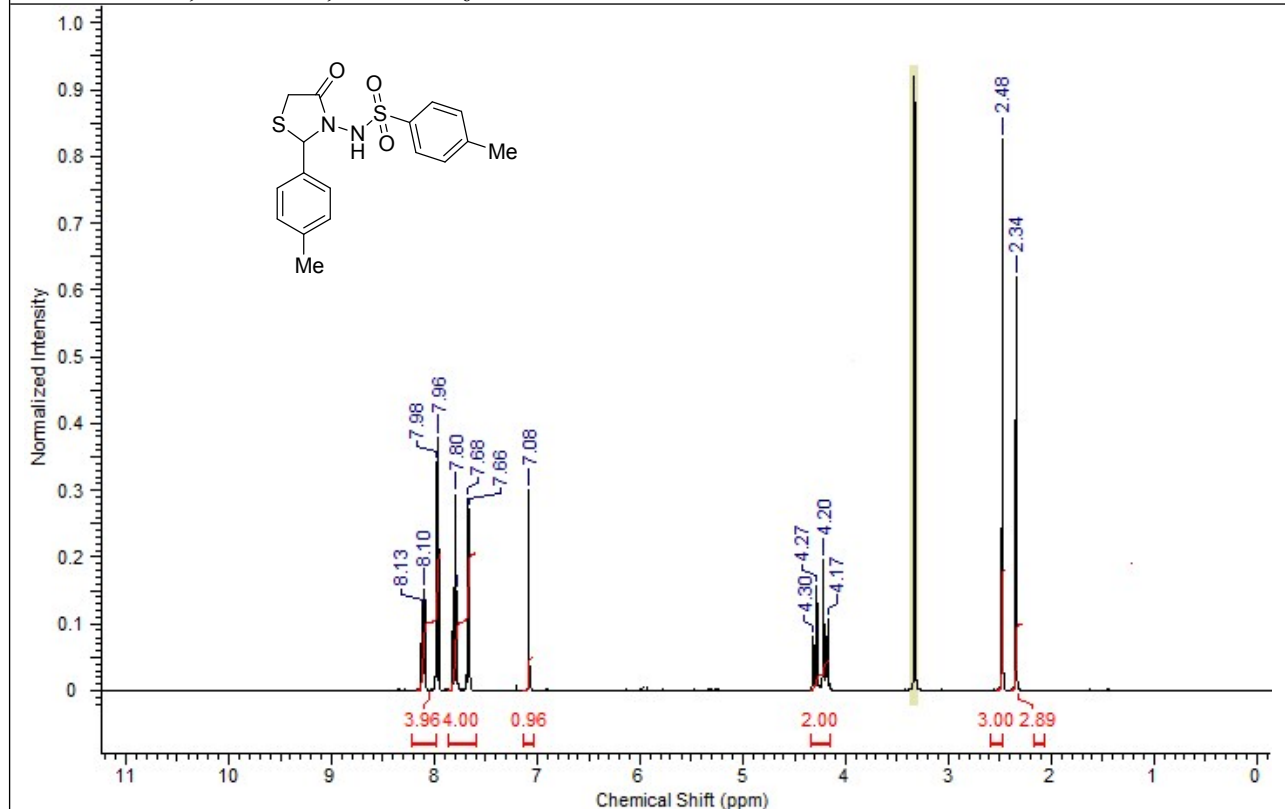



4b.  $^{13}\text{C}$  NMR, 100 MHz,  $\text{DMSO-d}_6$

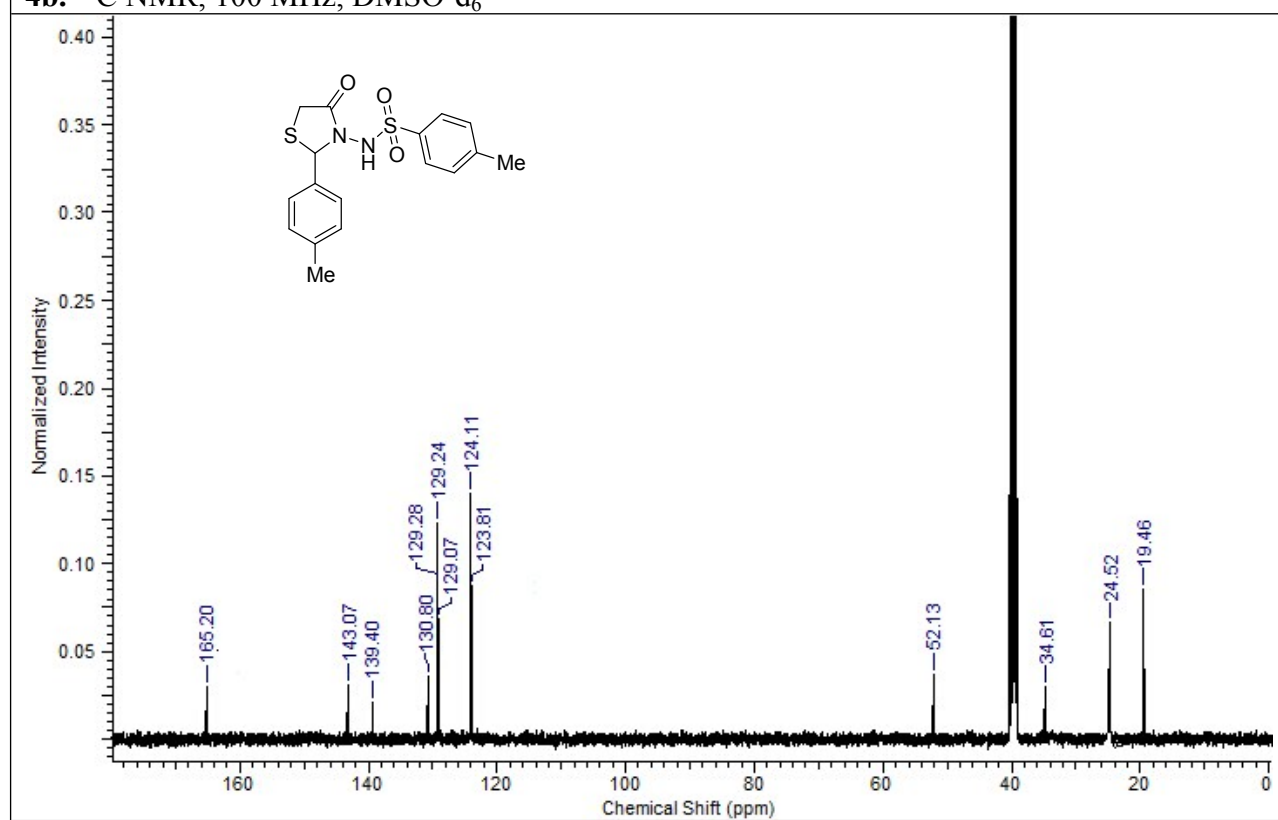

#### 4c. FT-IR

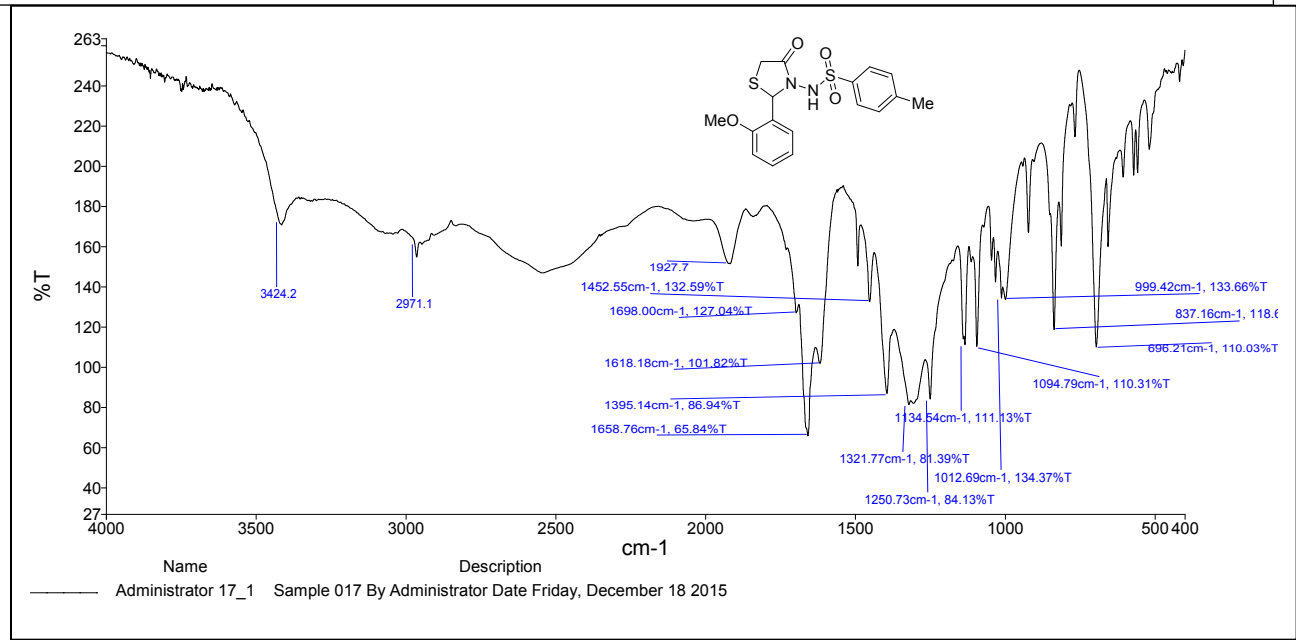

#### 4c. LC-MS

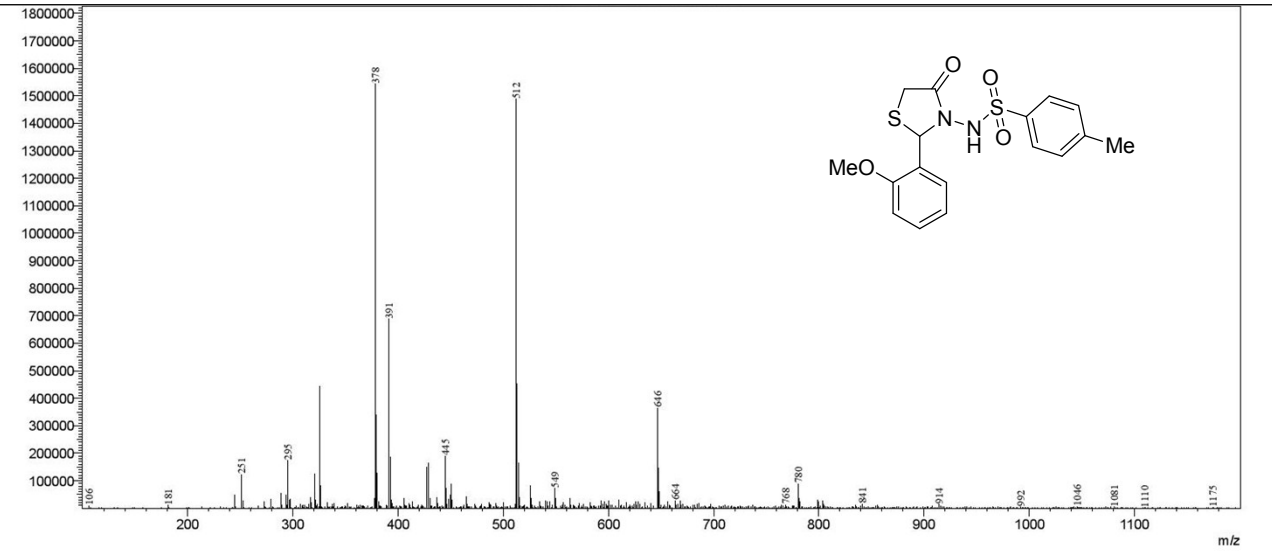

4c.  $^1\text{H}$  NMR, 400 MHz,  $\text{DMSO-d}_6$

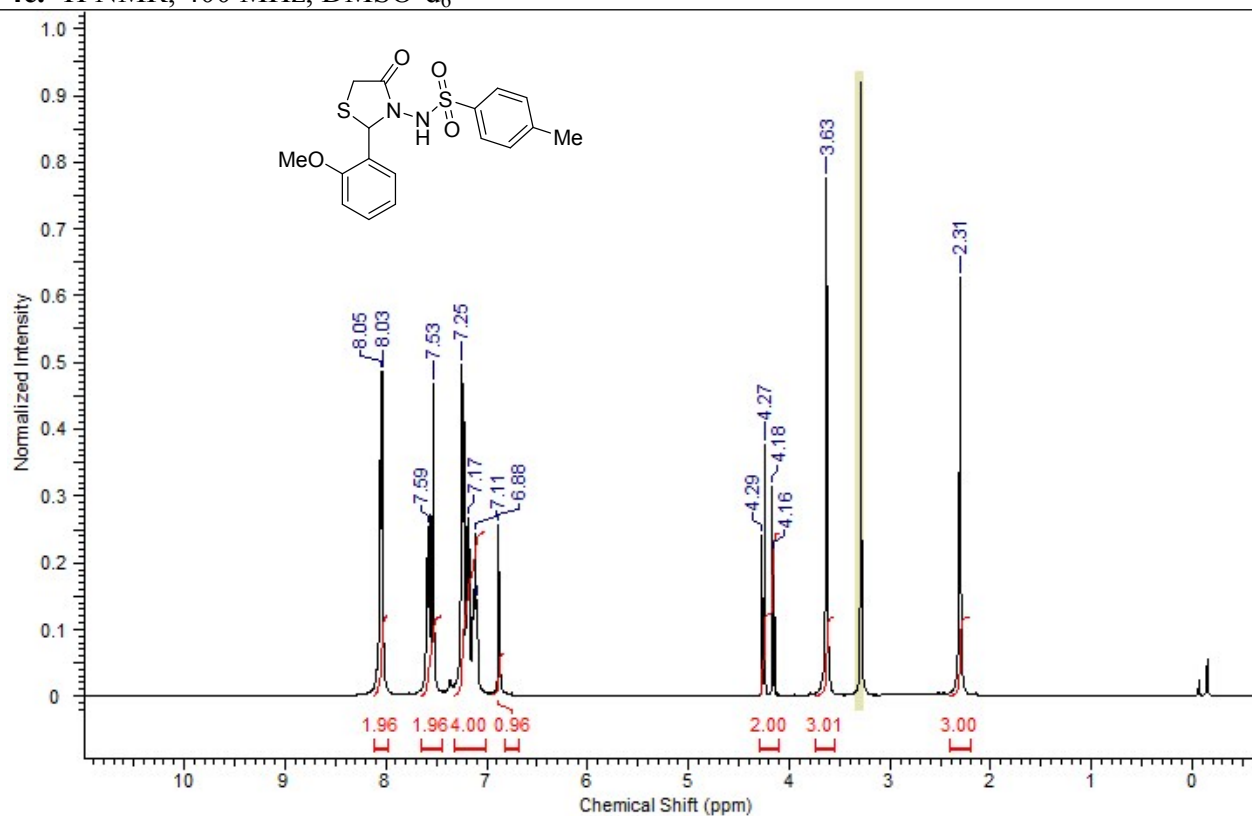

4c.  $^{13}\text{C}$  NMR, 100 MHz,  $\text{DMSO-d}_6$

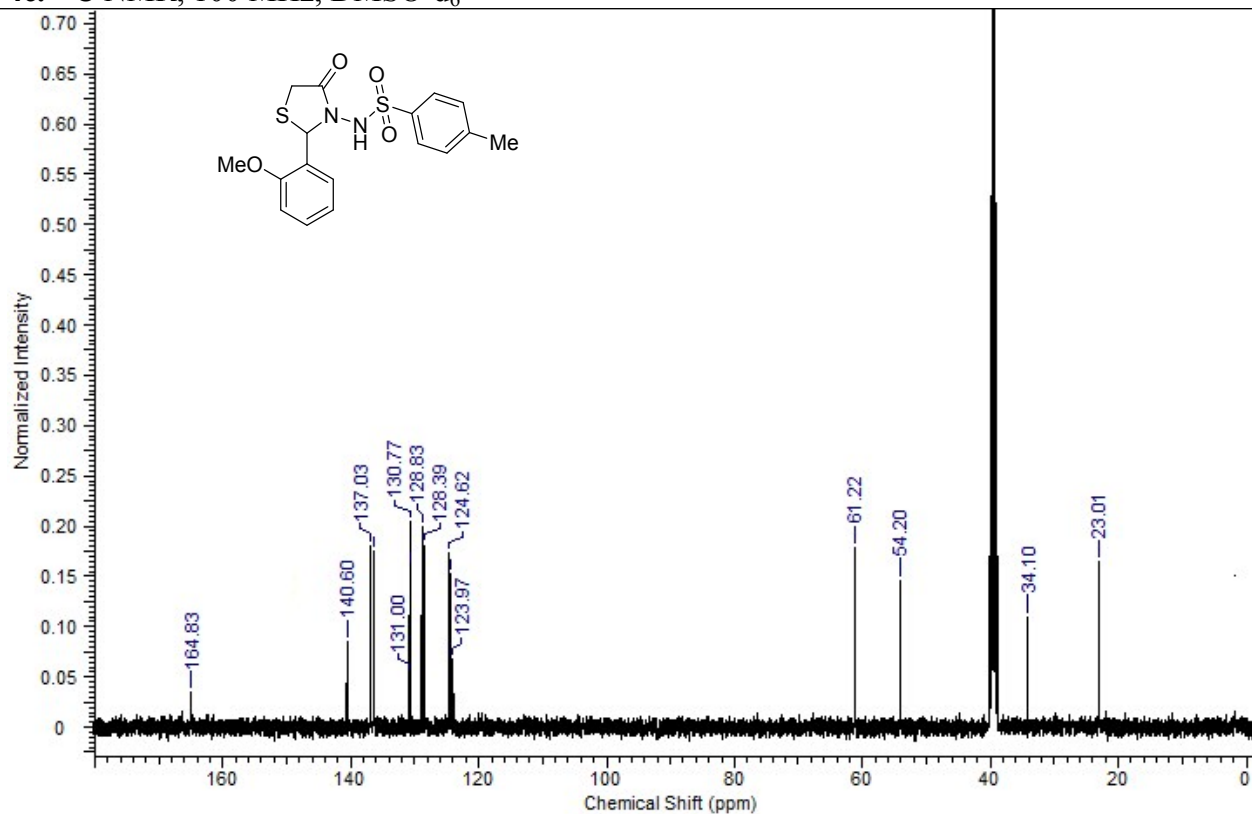

#### 4d. FT-IR

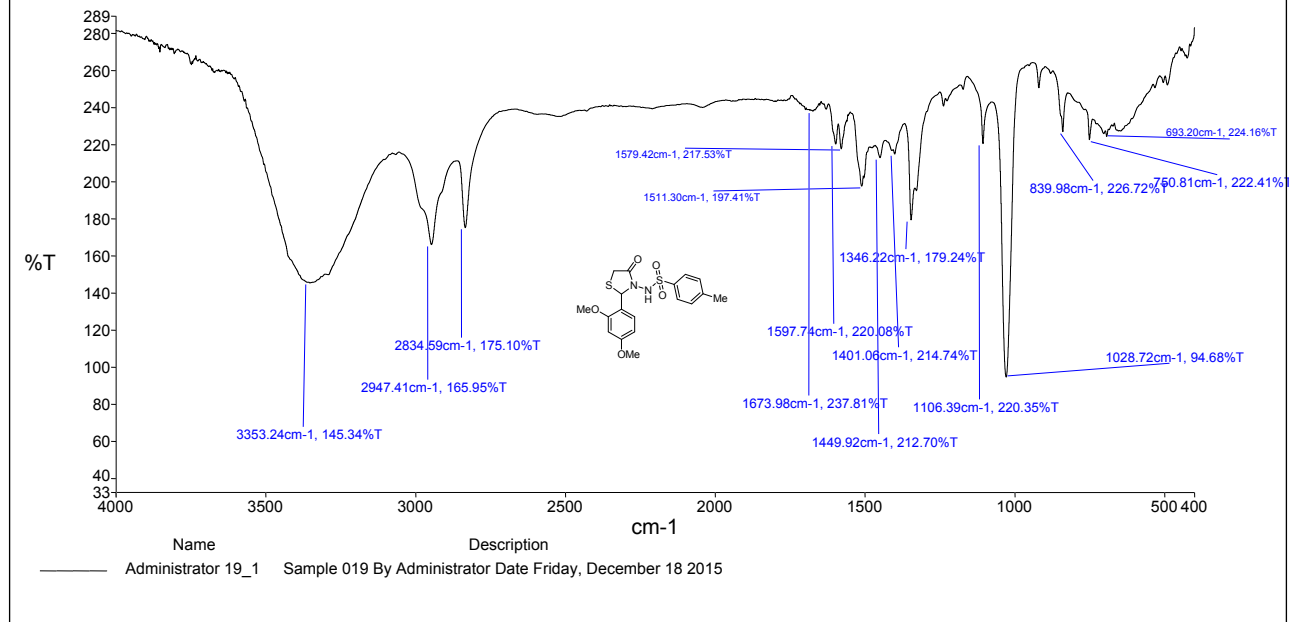

#### 4d. LC-MS

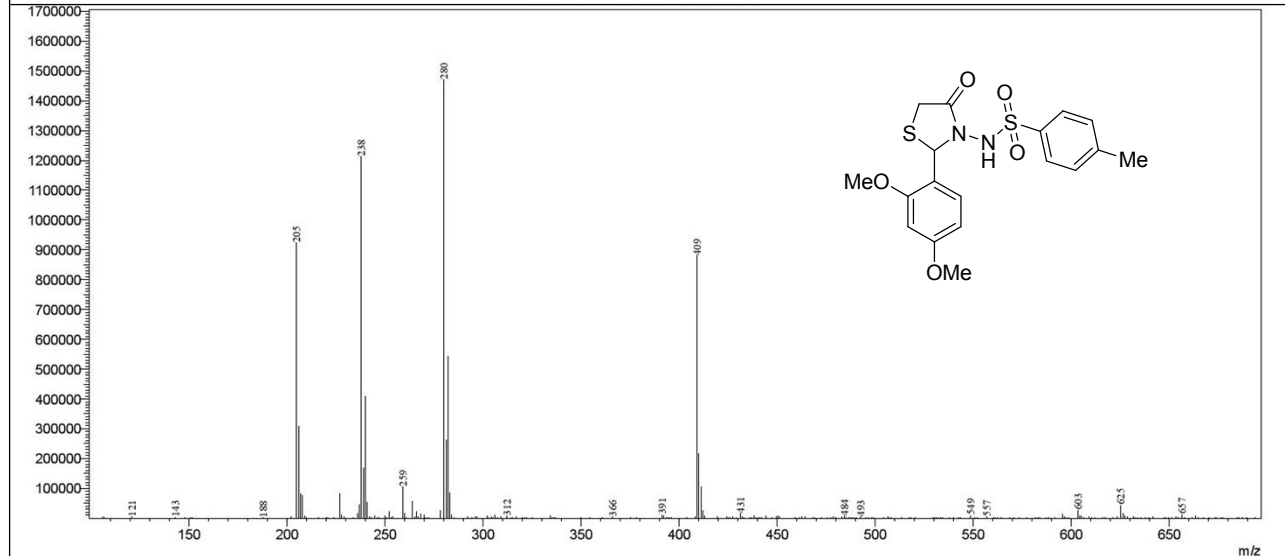

4d. <sup>1</sup>H NMR, 400 MHz, DMSO-d<sub>6</sub>

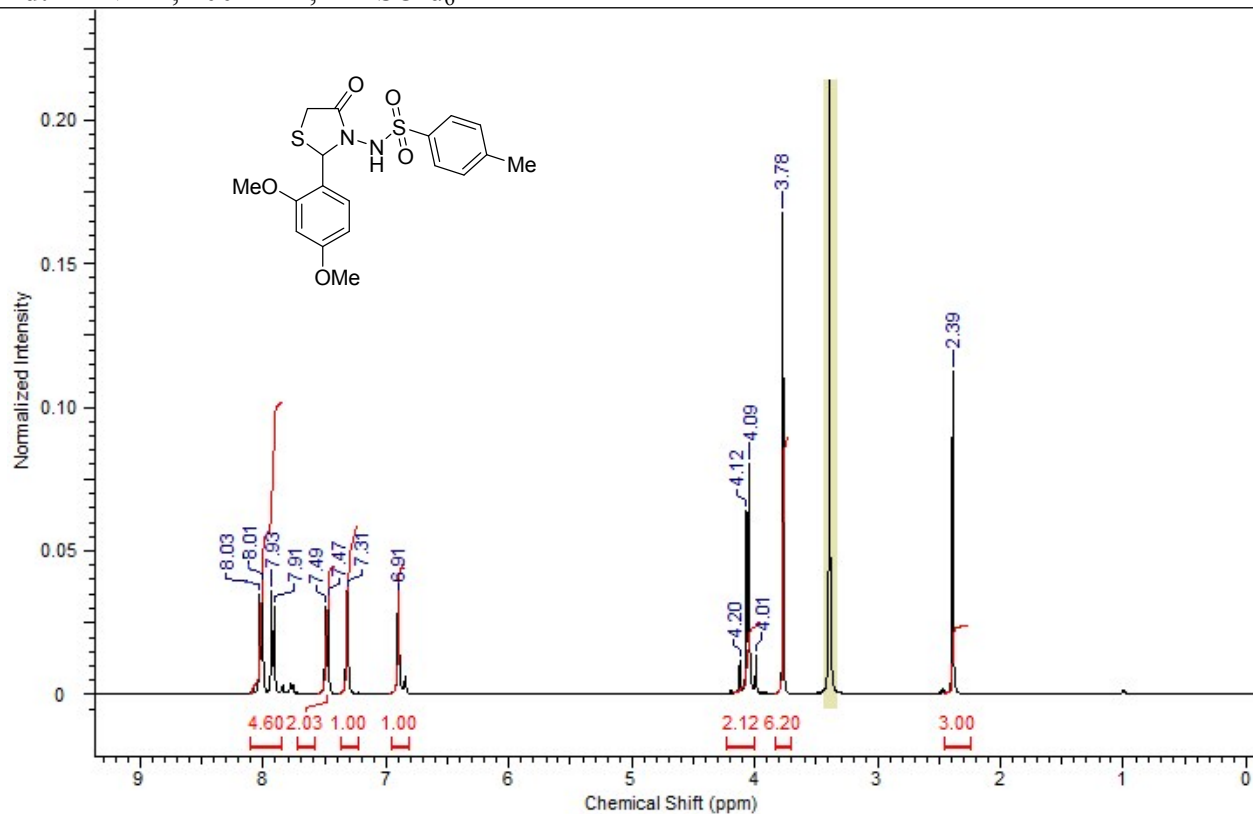

4d. <sup>13</sup>C NMR, 100 MHz, DMSO-d<sub>6</sub>

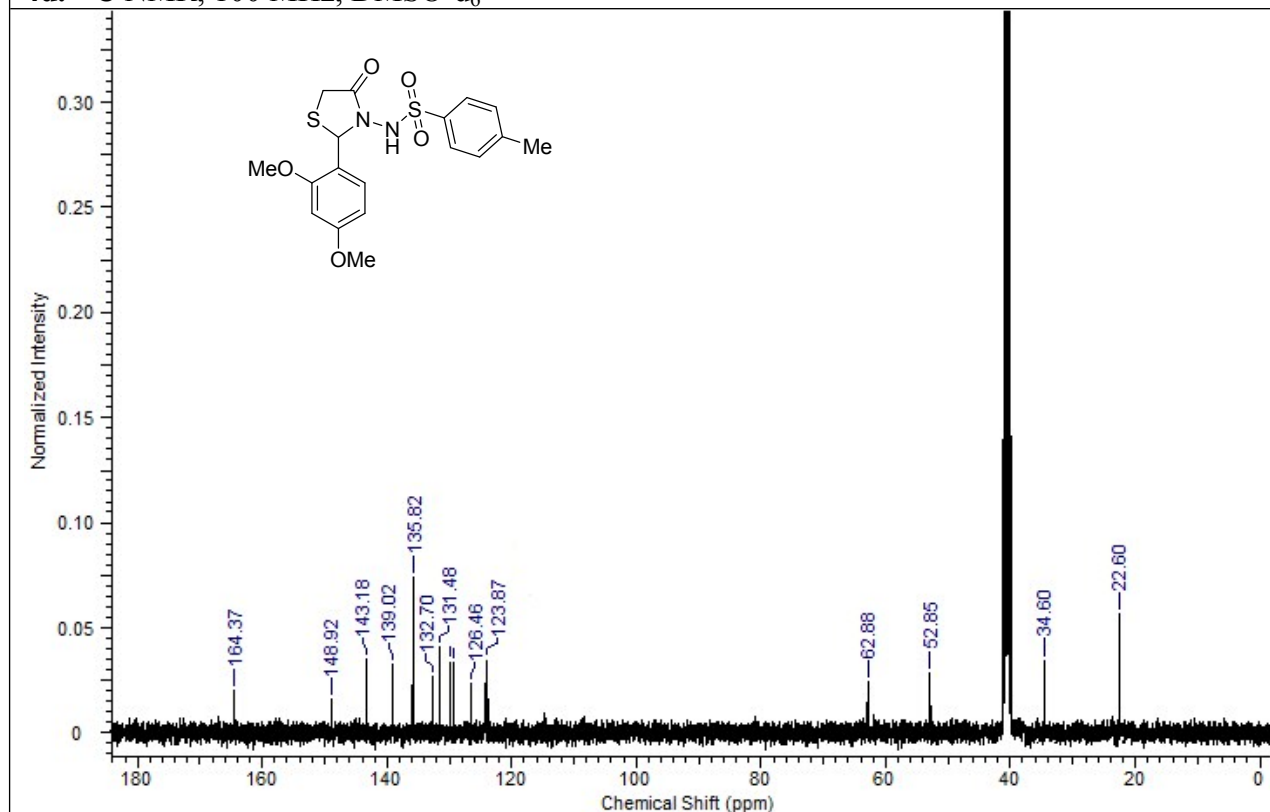

# 4e. FT-IR

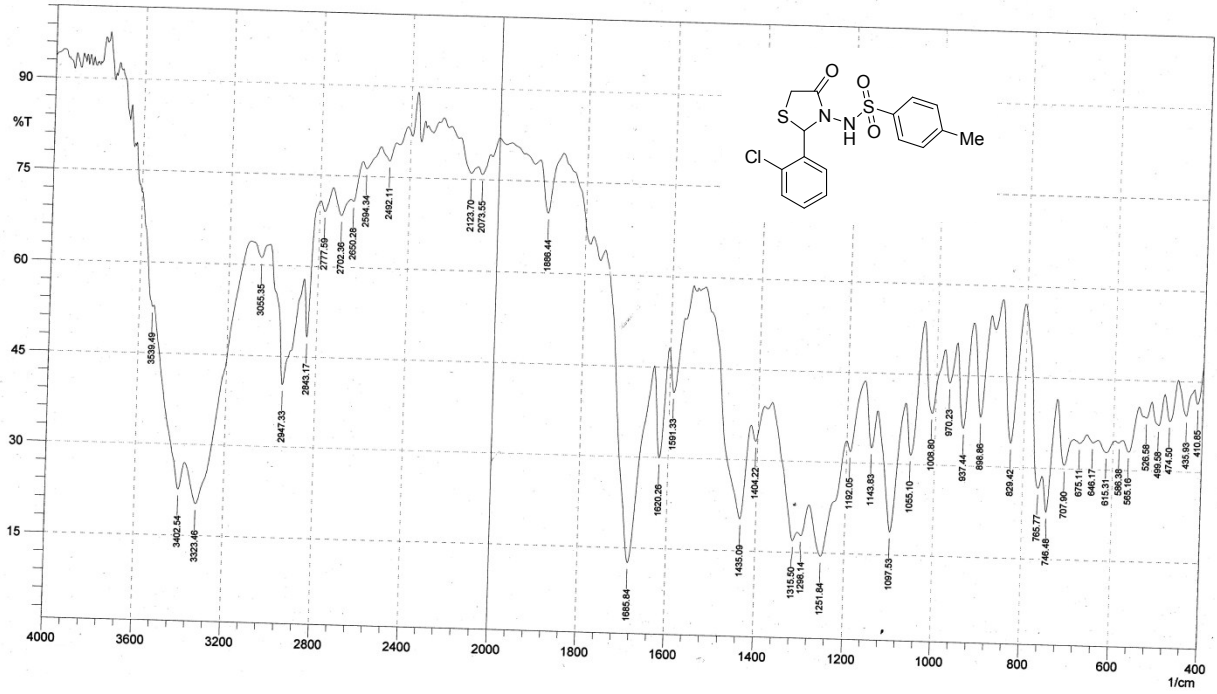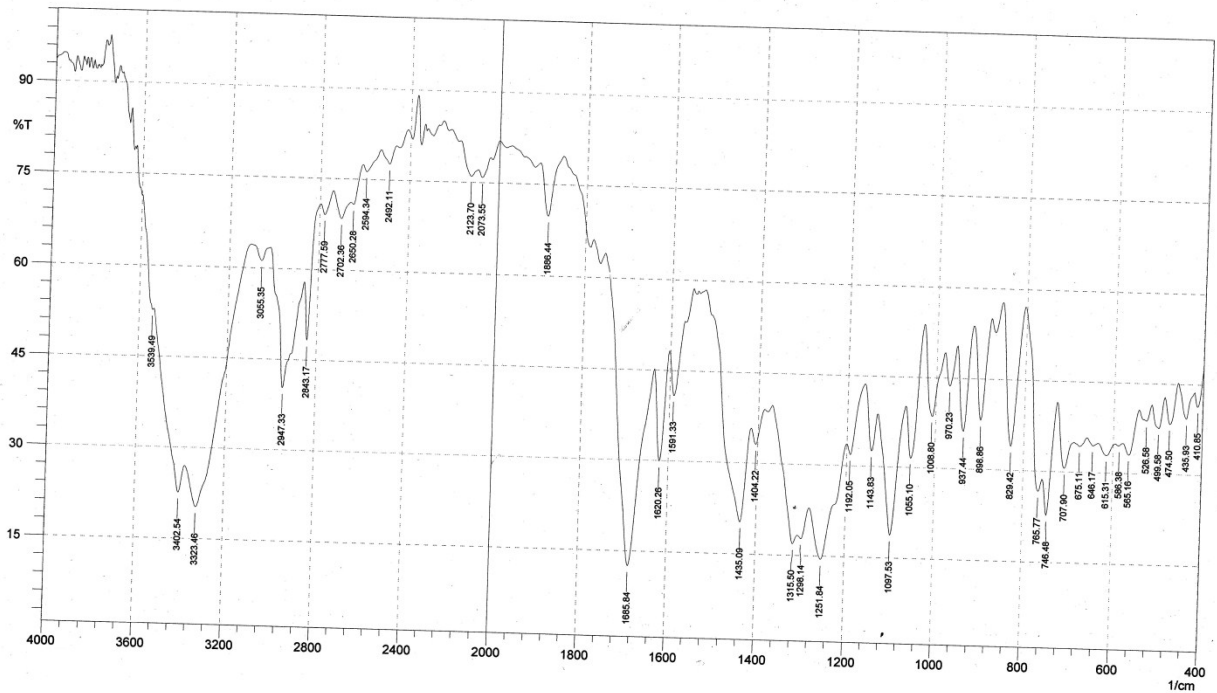

#### 4e. HRMS

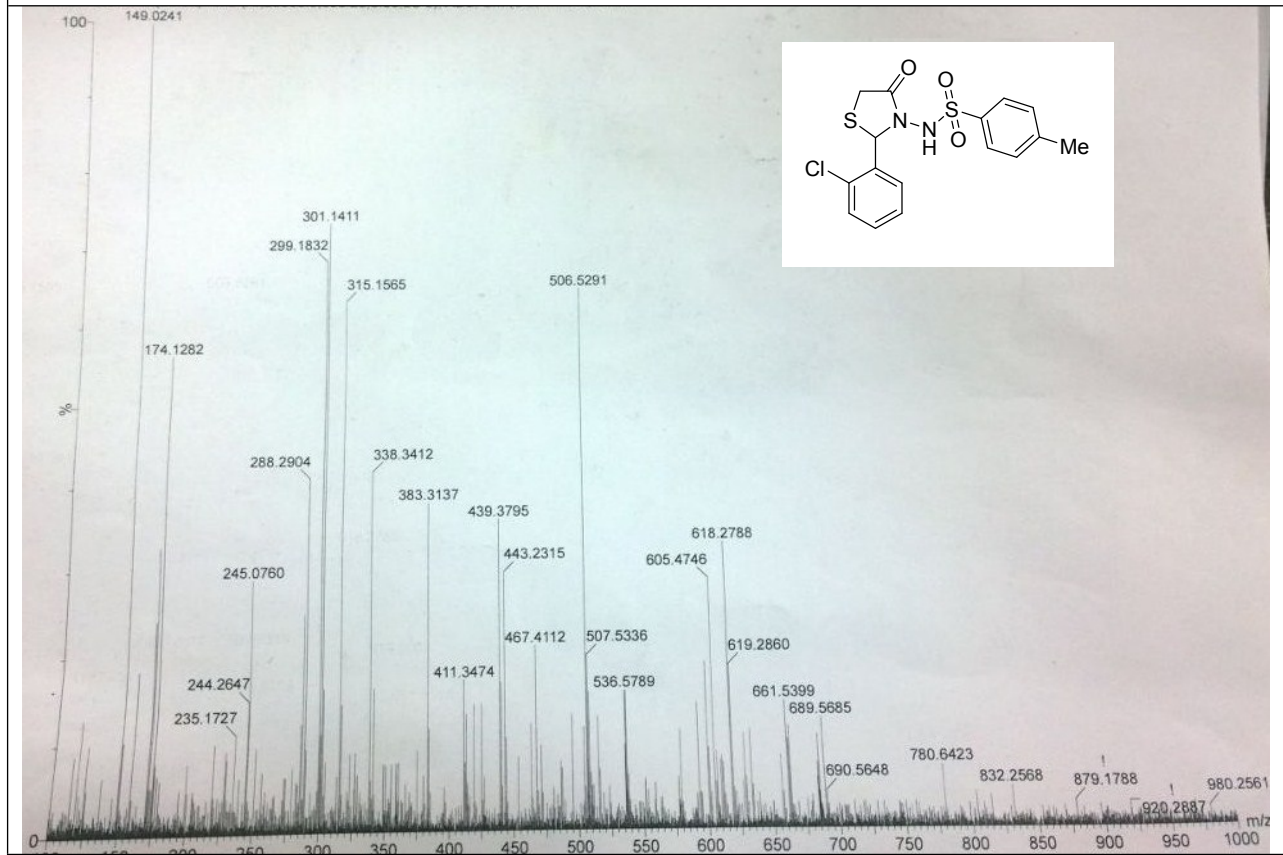

4e. <sup>1</sup>H NMR, 400 MHz, DMSO-d<sub>6</sub>

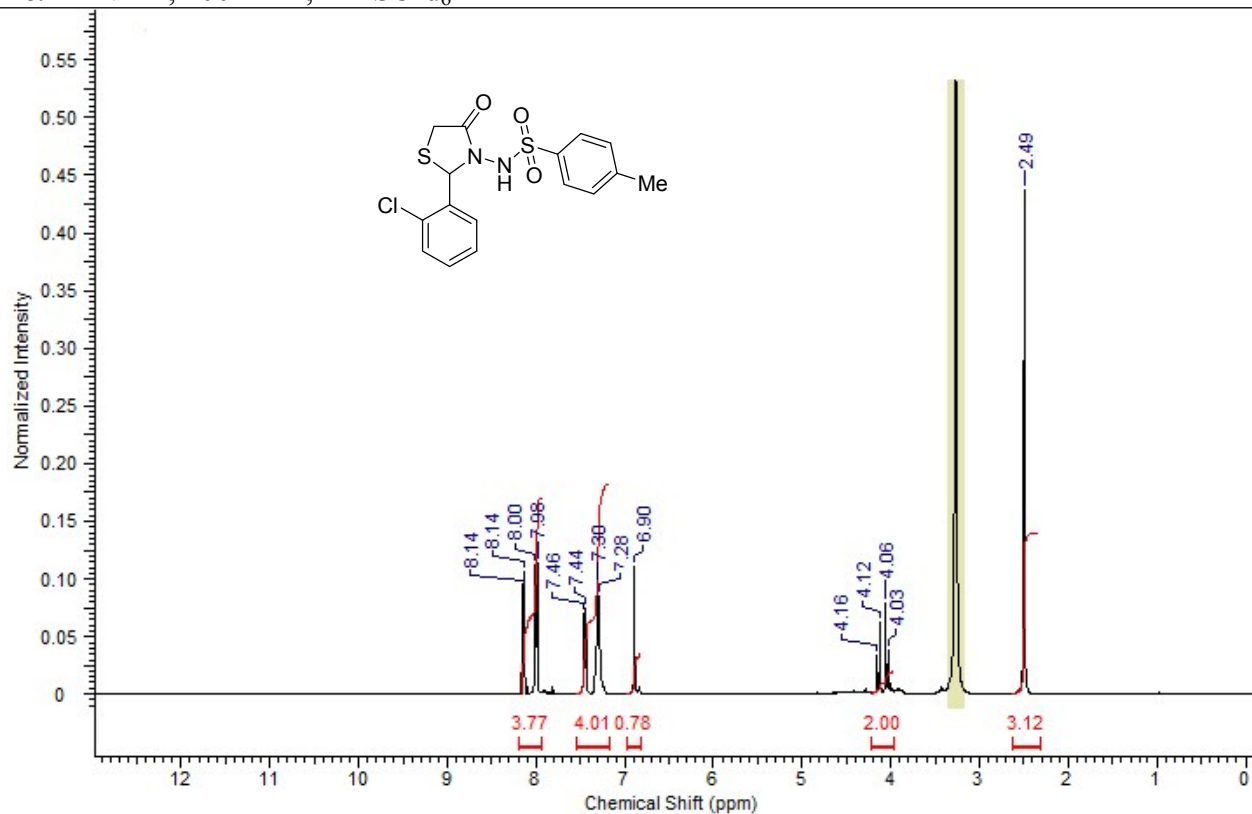

4e. <sup>13</sup>C NMR, 100 MHz, DMSO-d<sub>6</sub>

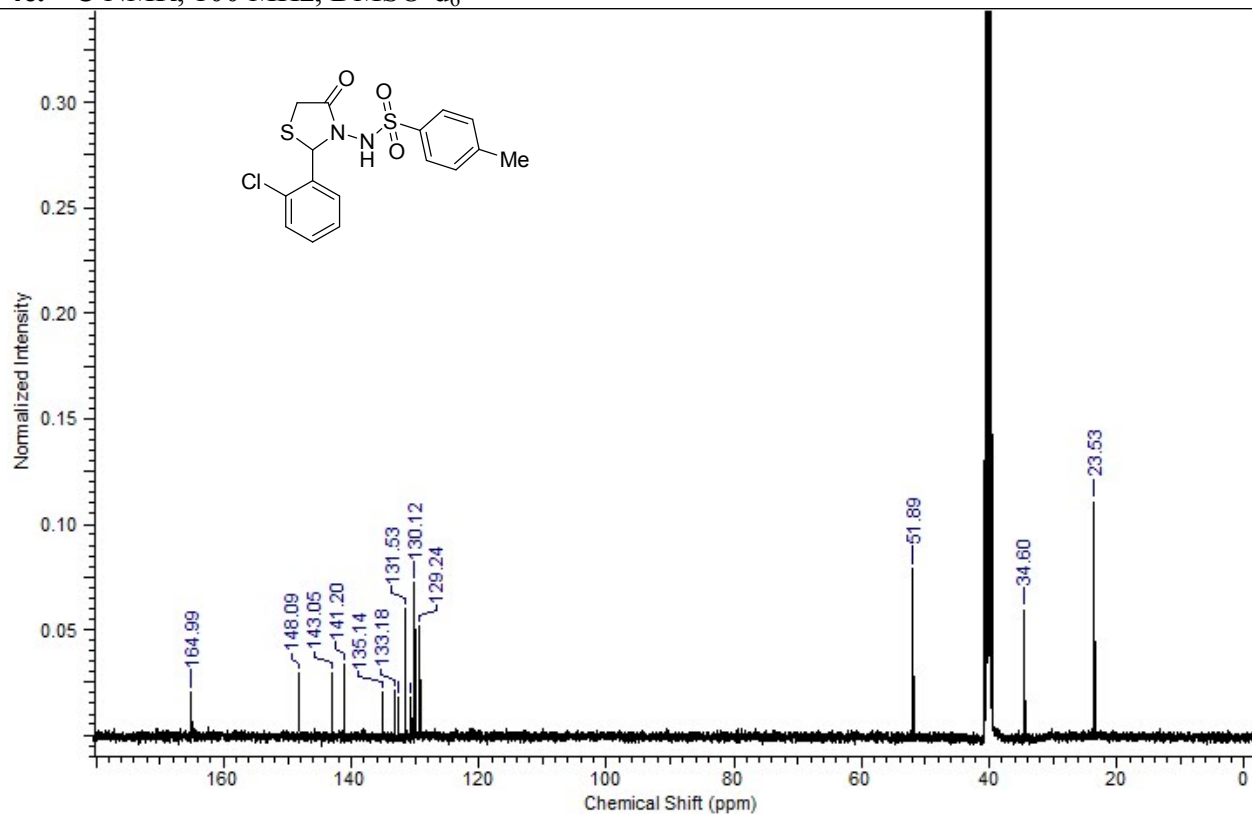



#### 4f. FT-IR

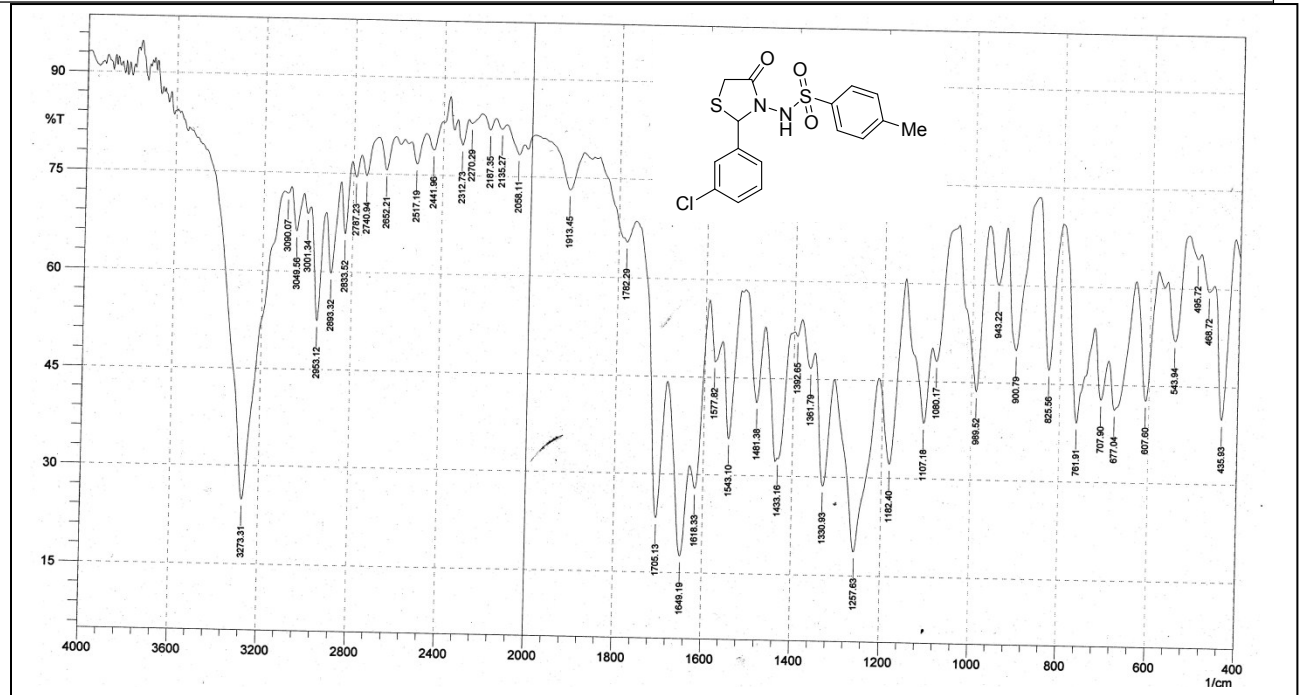

#### 4f. HRMS

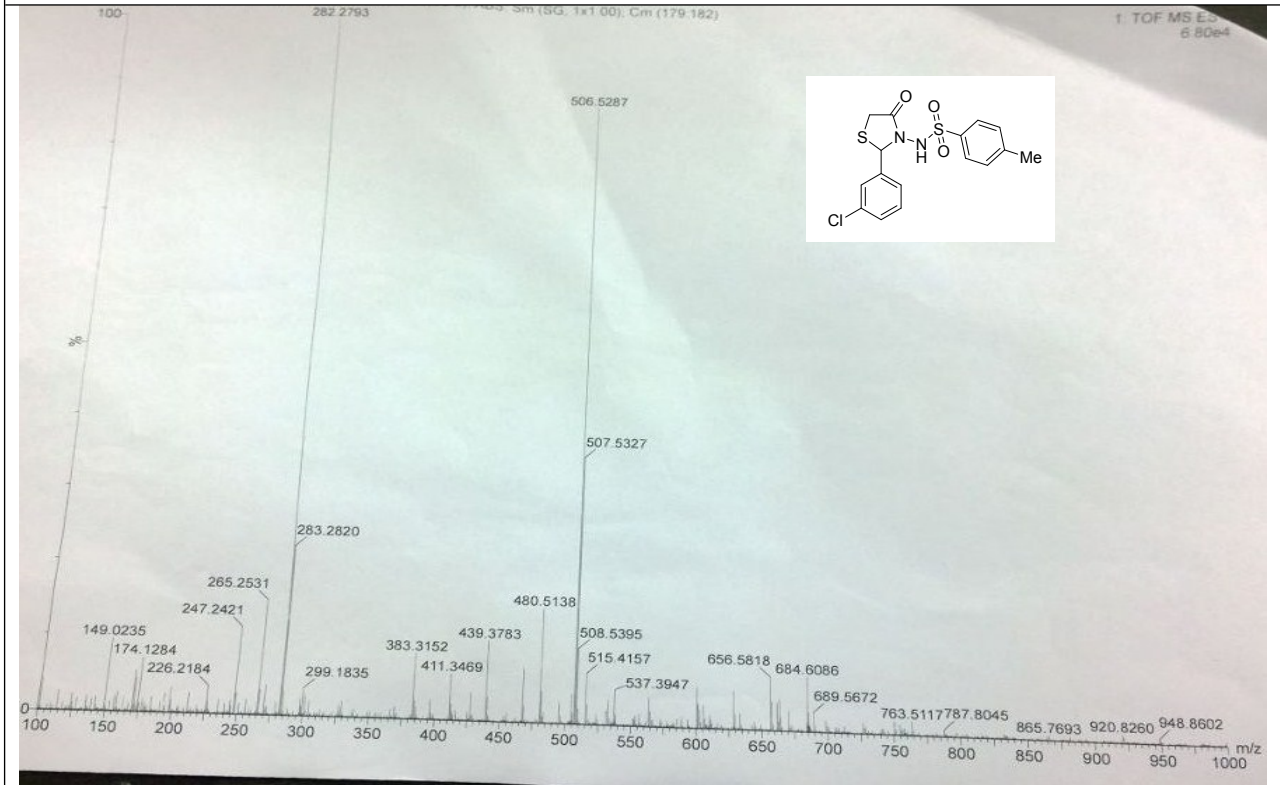

4f.  $^1\text{H}$  NMR, 400 MHz,  $\text{DMSO-d}_6$

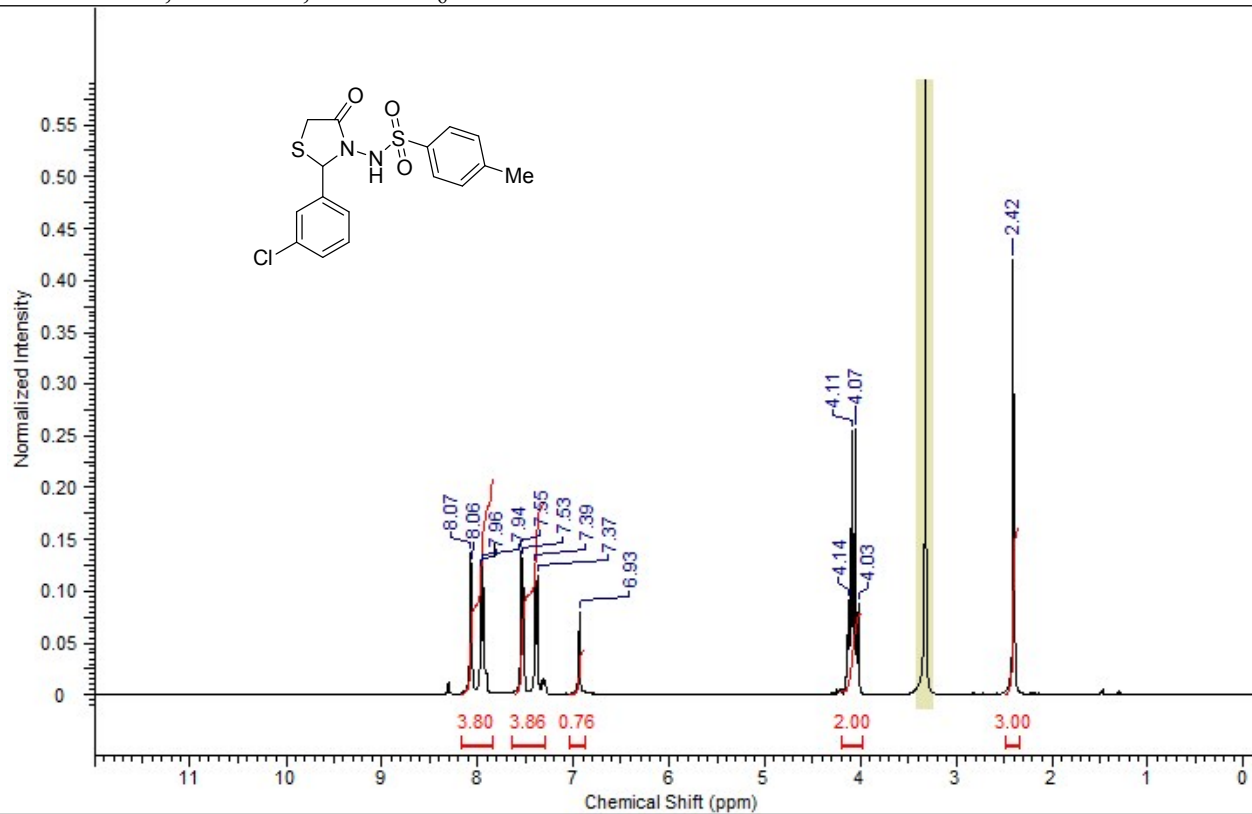

4f.  $^{13}\text{C}$  NMR, 100 MHz,  $\text{DMSO-d}_6$

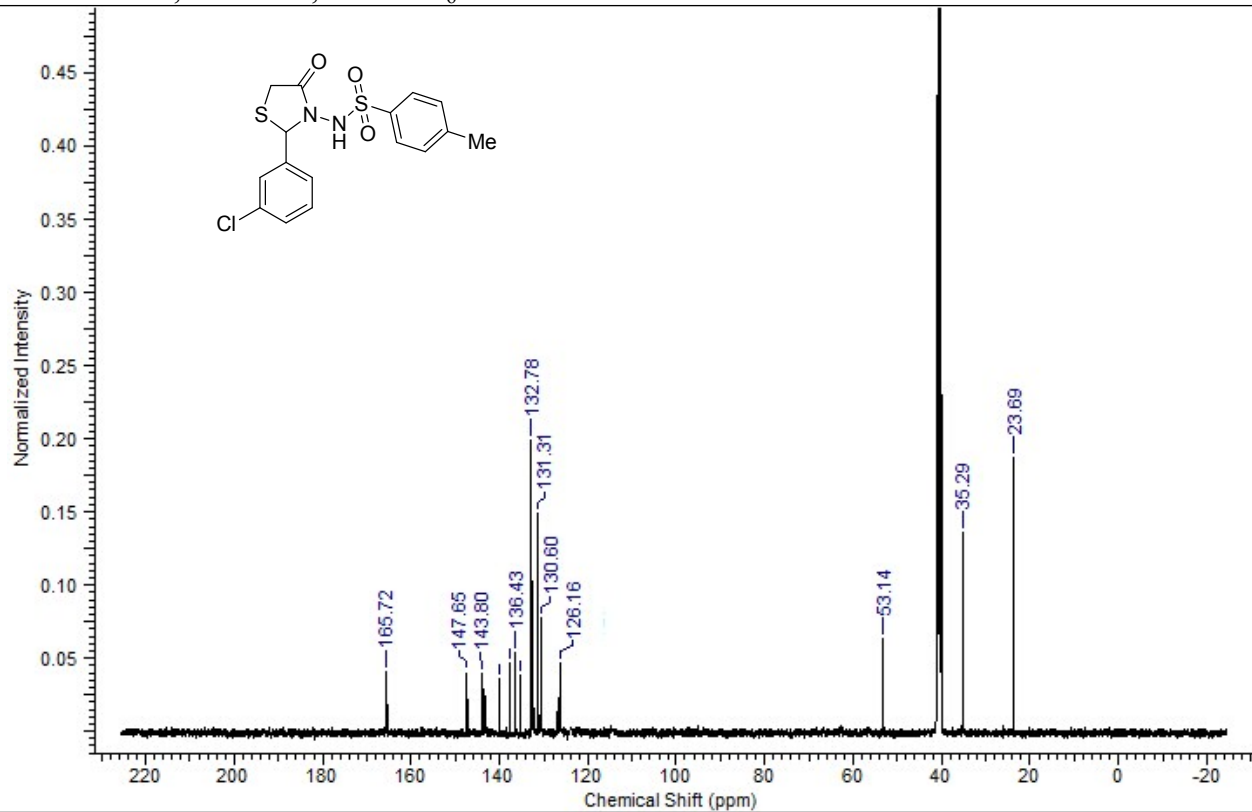

### 4g. FT-IR

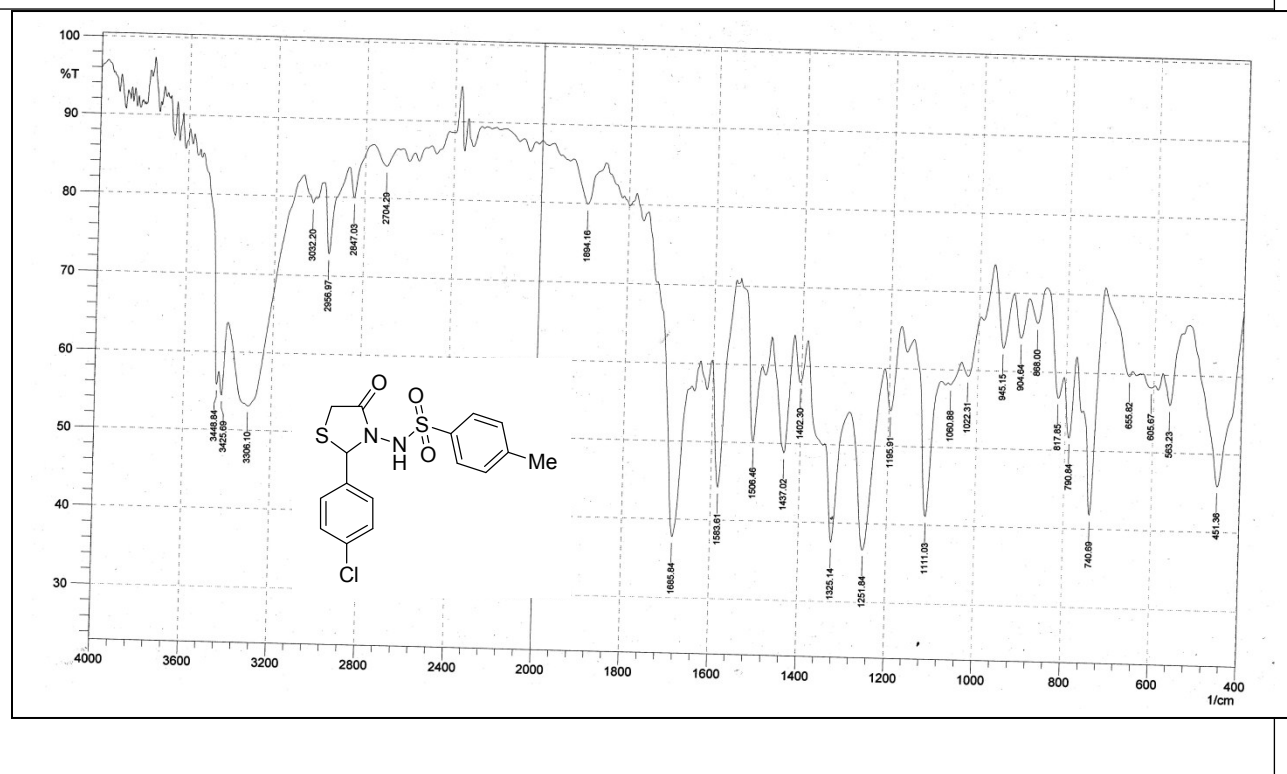

### 4g. LC-MS

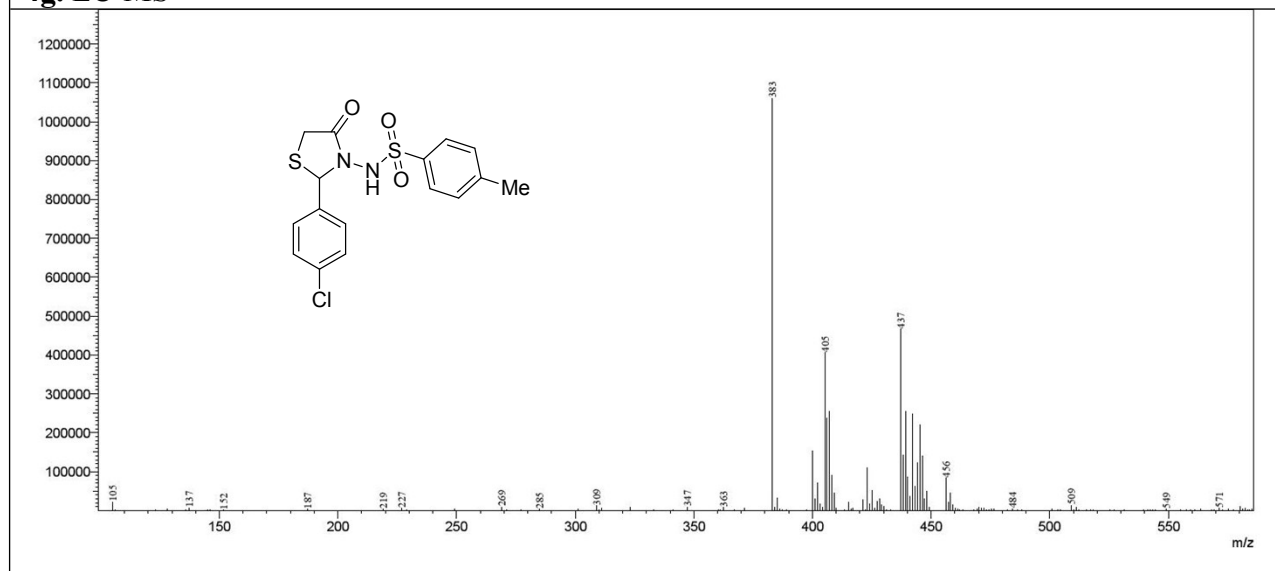

4g. <sup>1</sup>H NMR, 400 MHz, DMSO-d<sub>6</sub>

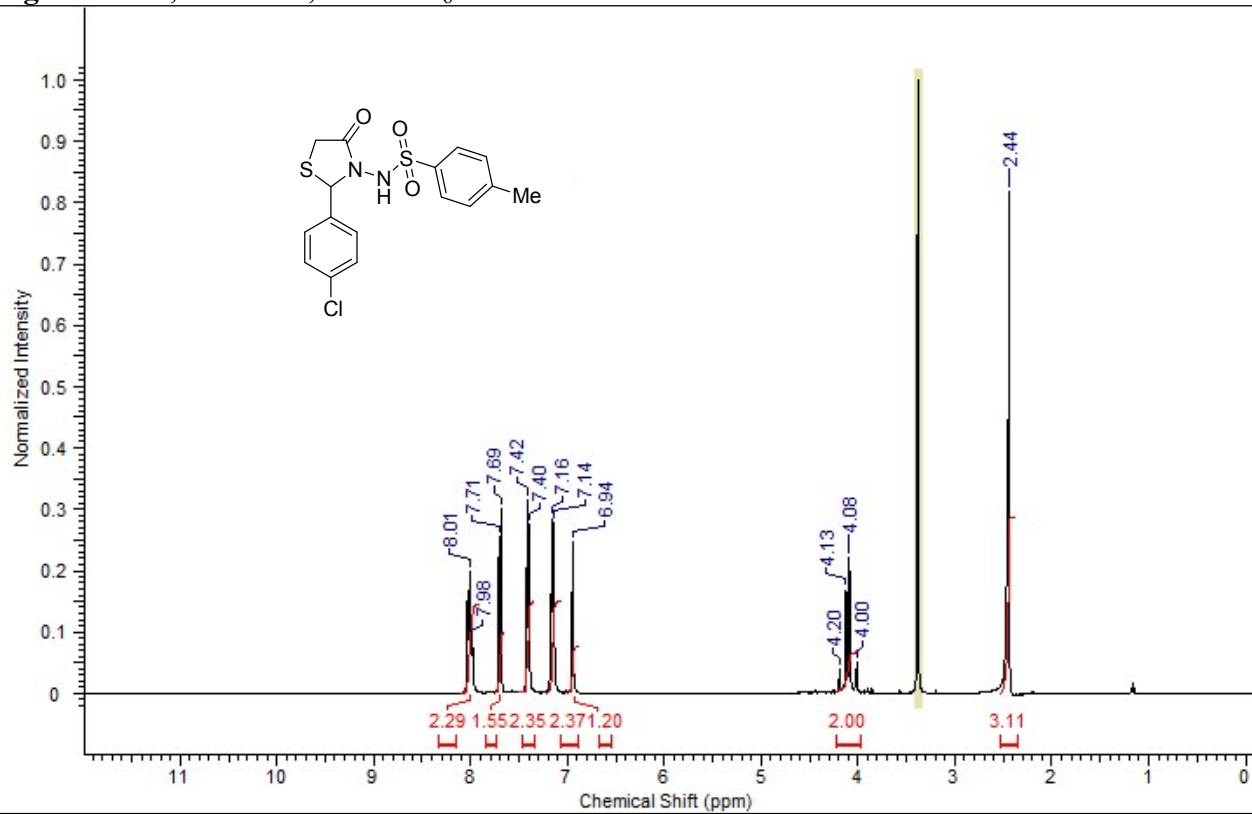

4g. <sup>13</sup>C NMR, 100 MHz, DMSO-d<sub>6</sub>

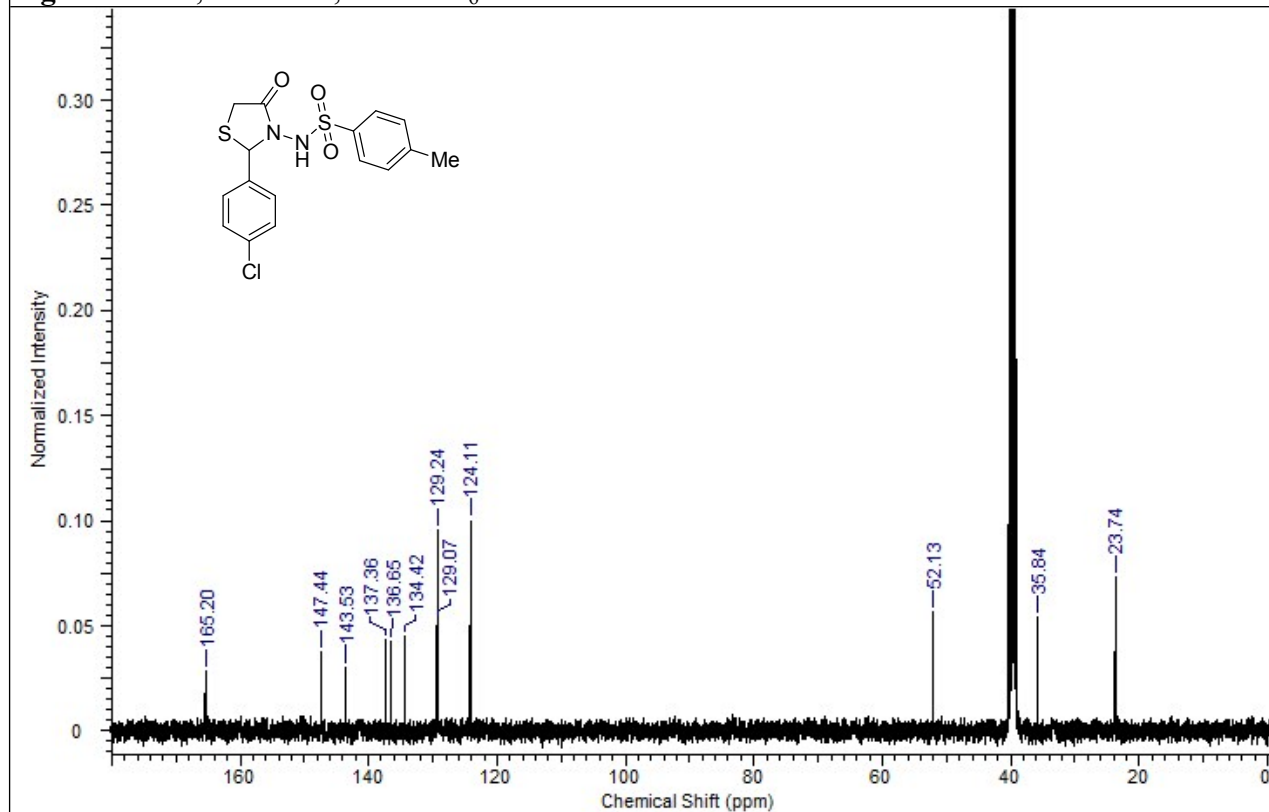

#### 4h. FT-IR

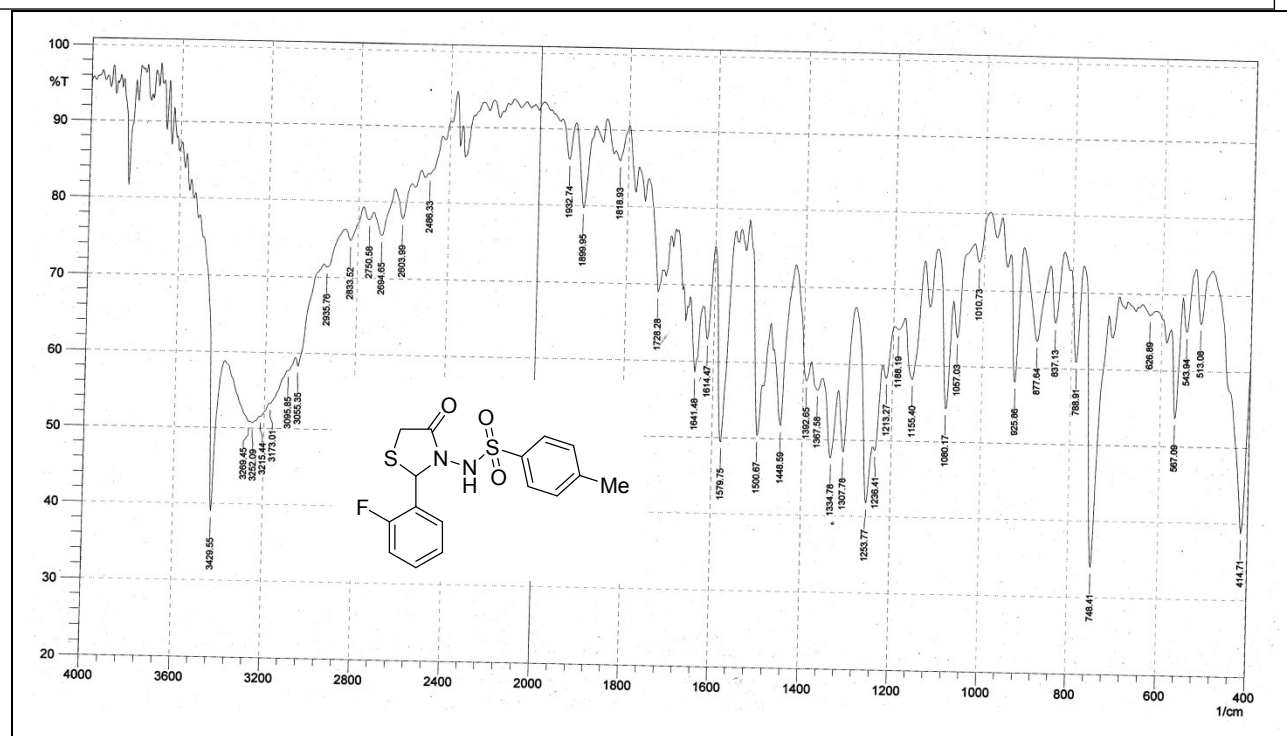

#### 4h. LC-MS

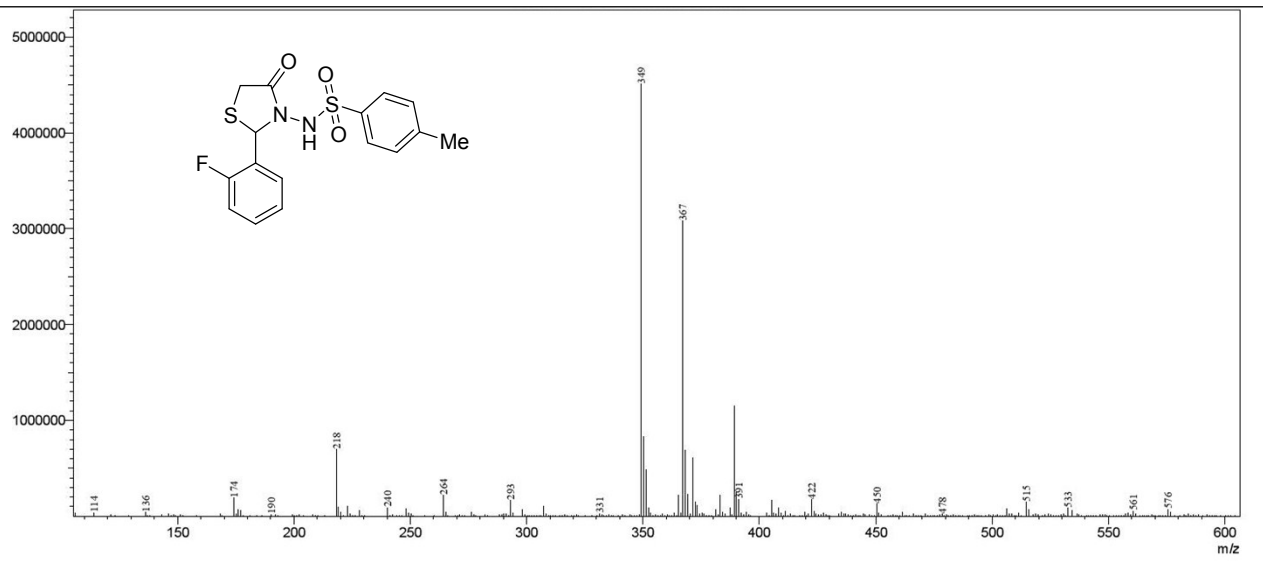

4h. <sup>1</sup>H NMR, 400 MHz, DMSO-d<sub>6</sub>

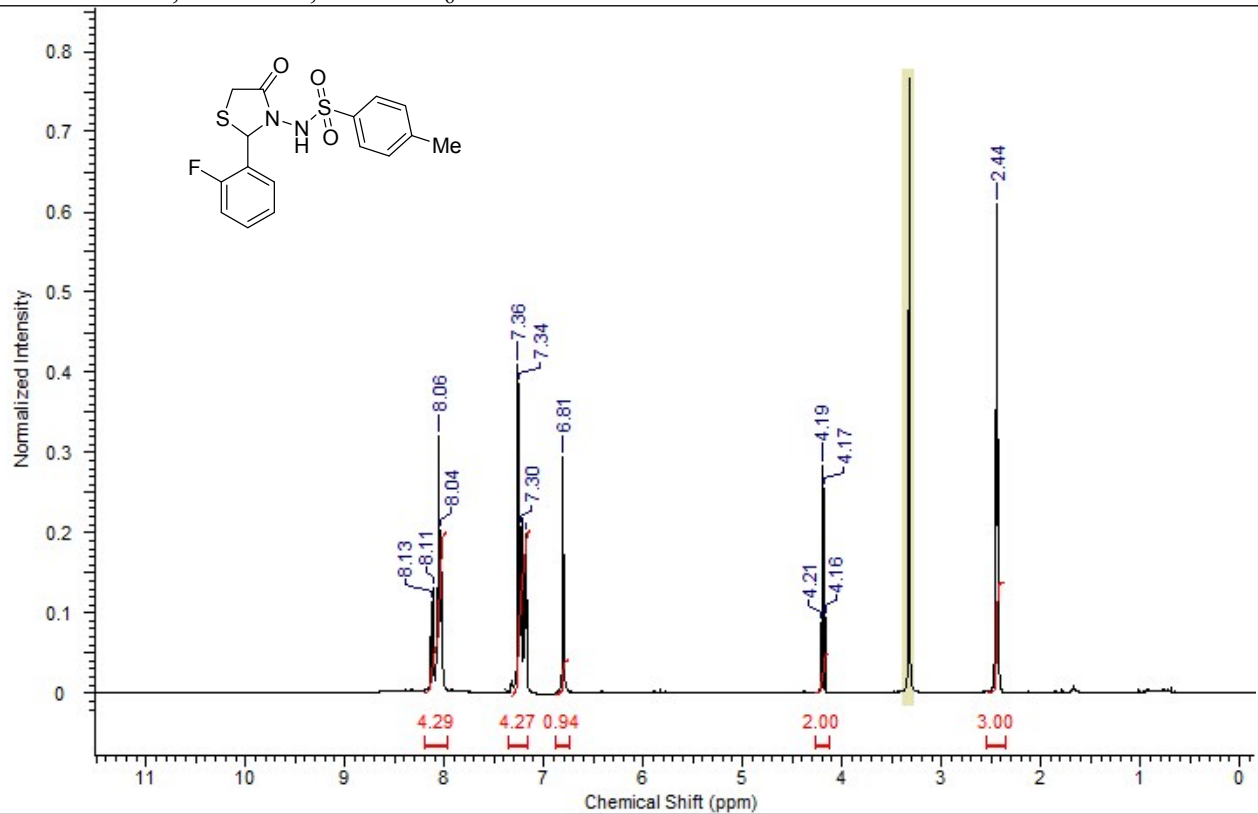

4h. <sup>13</sup>C NMR, 100 MHz, DMSO-d<sub>6</sub>

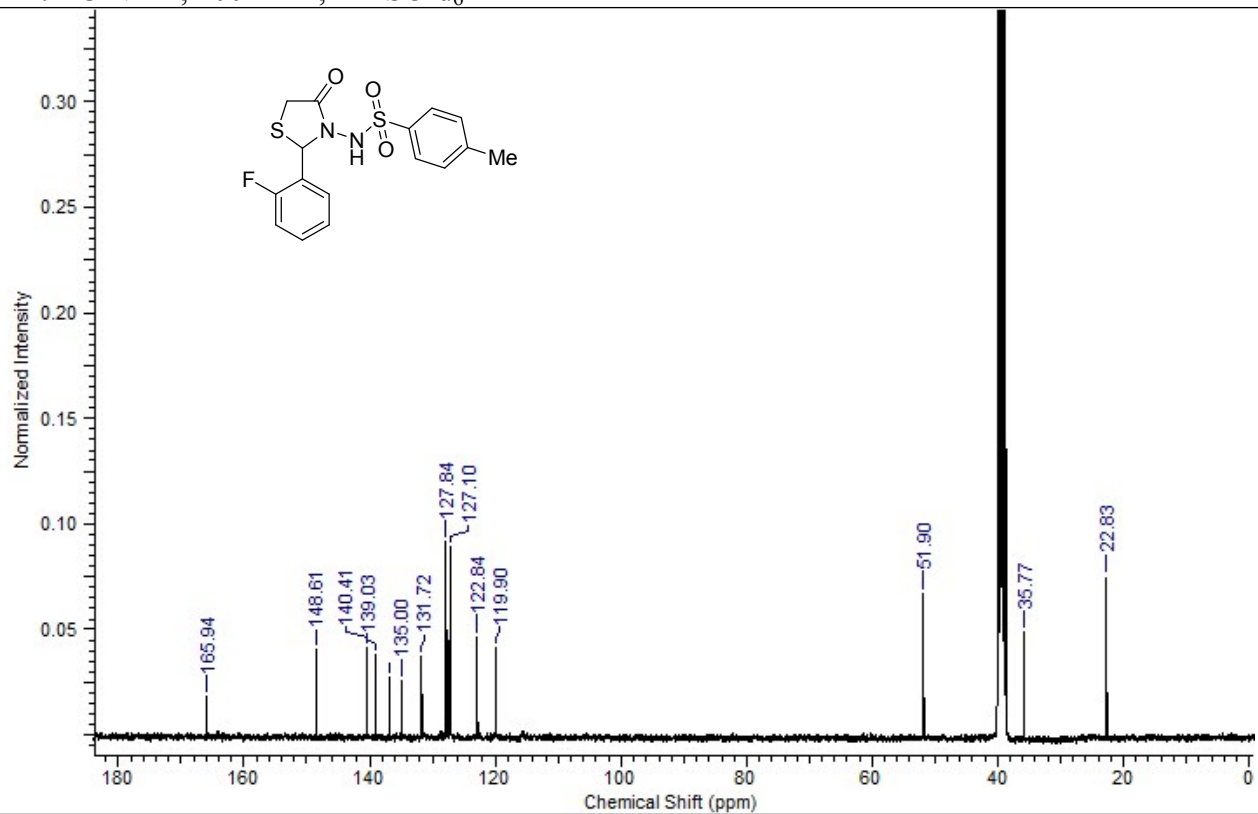

#### 4i. FT-IR

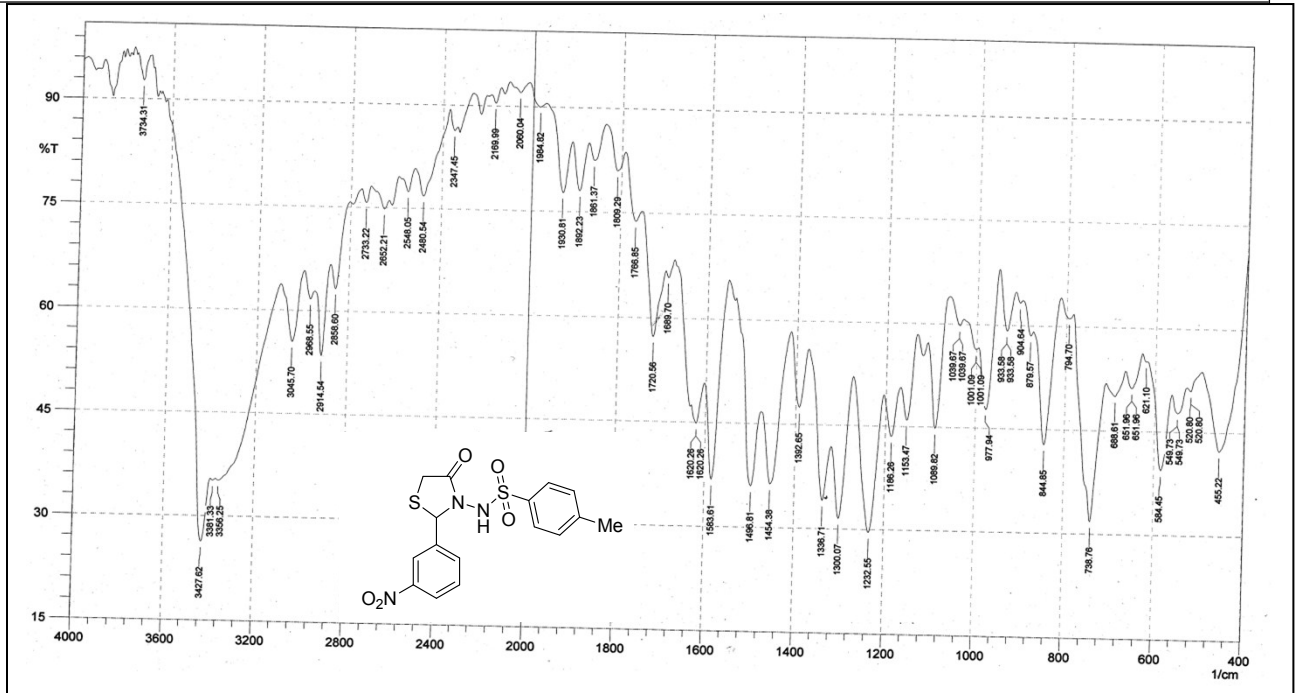

#### 4i. HRMS

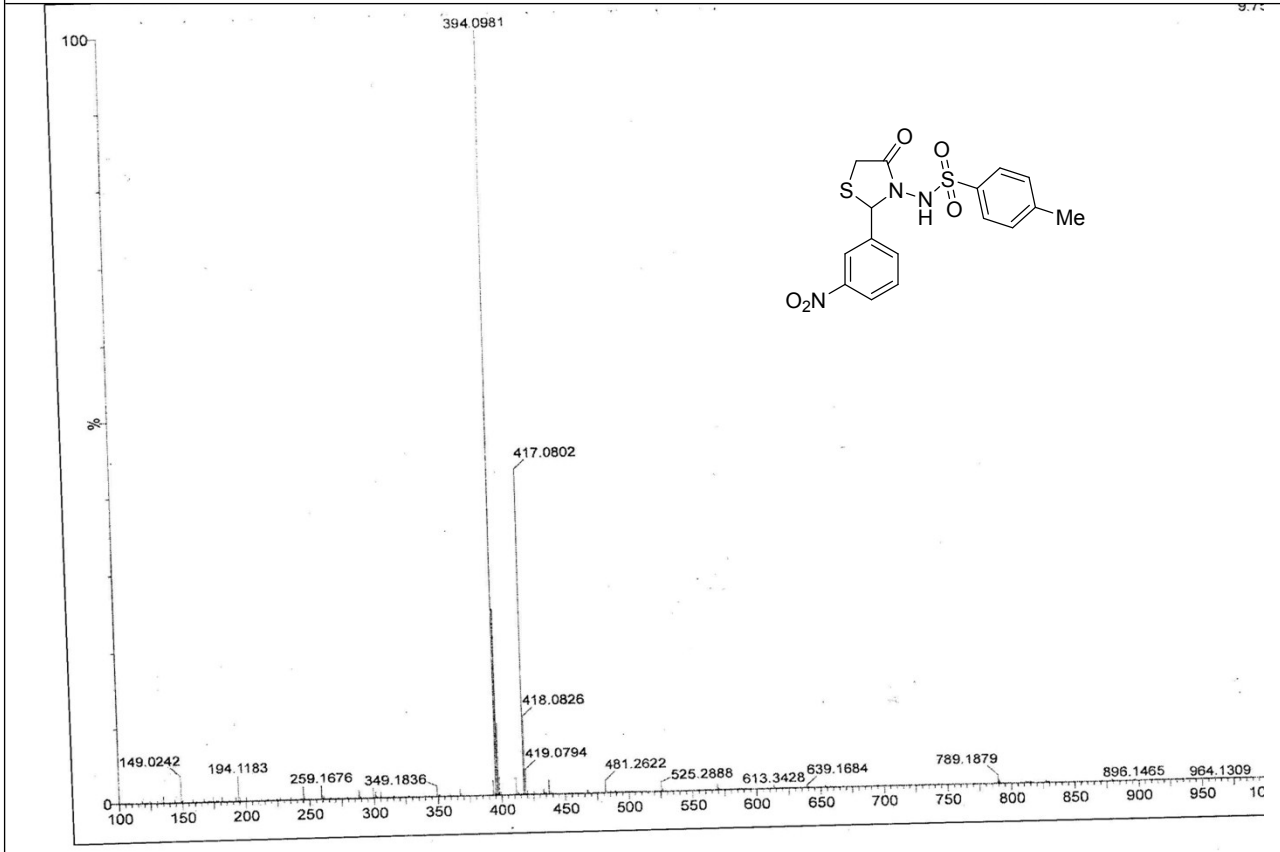

4i. <sup>1</sup>H NMR, 400 MHz, DMSO-d<sub>6</sub>

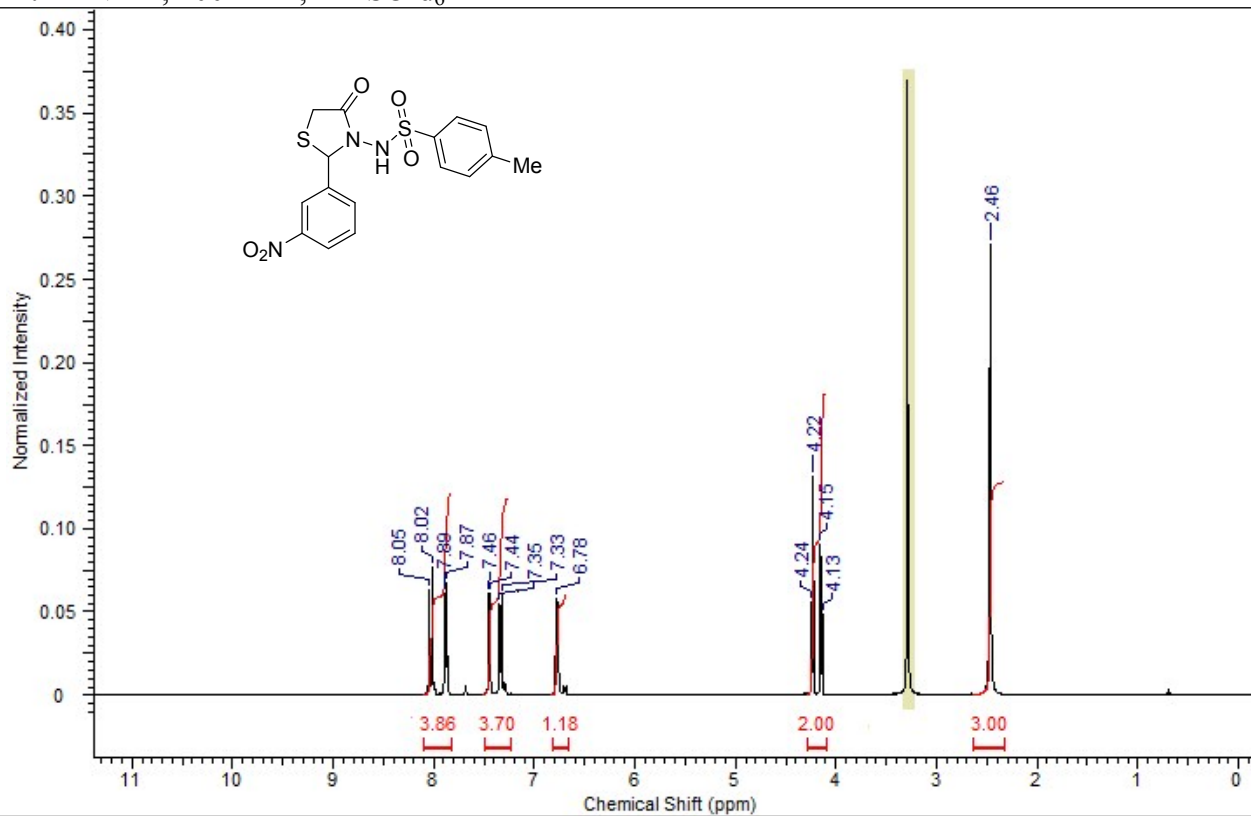

4i. <sup>13</sup>C NMR, 100 MHz, DMSO-d<sub>6</sub>

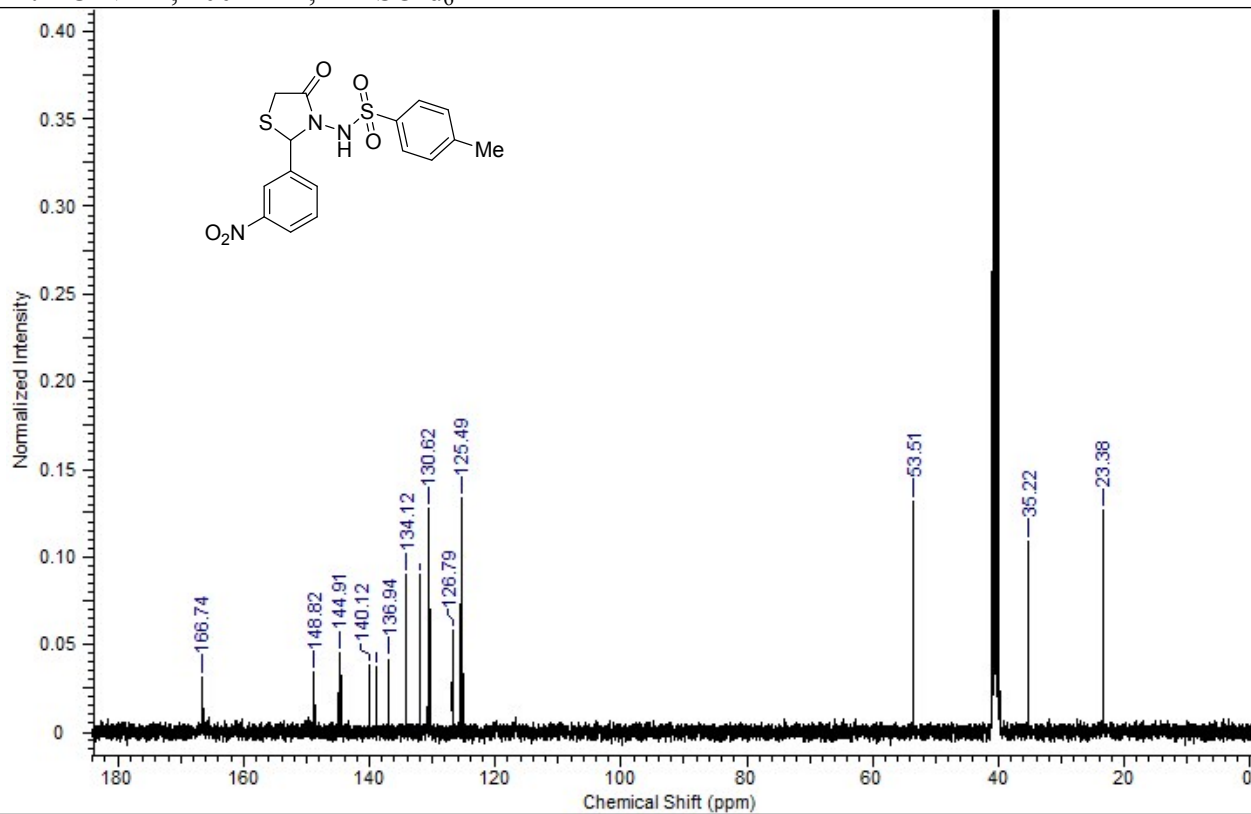



# 4j. FT-IR

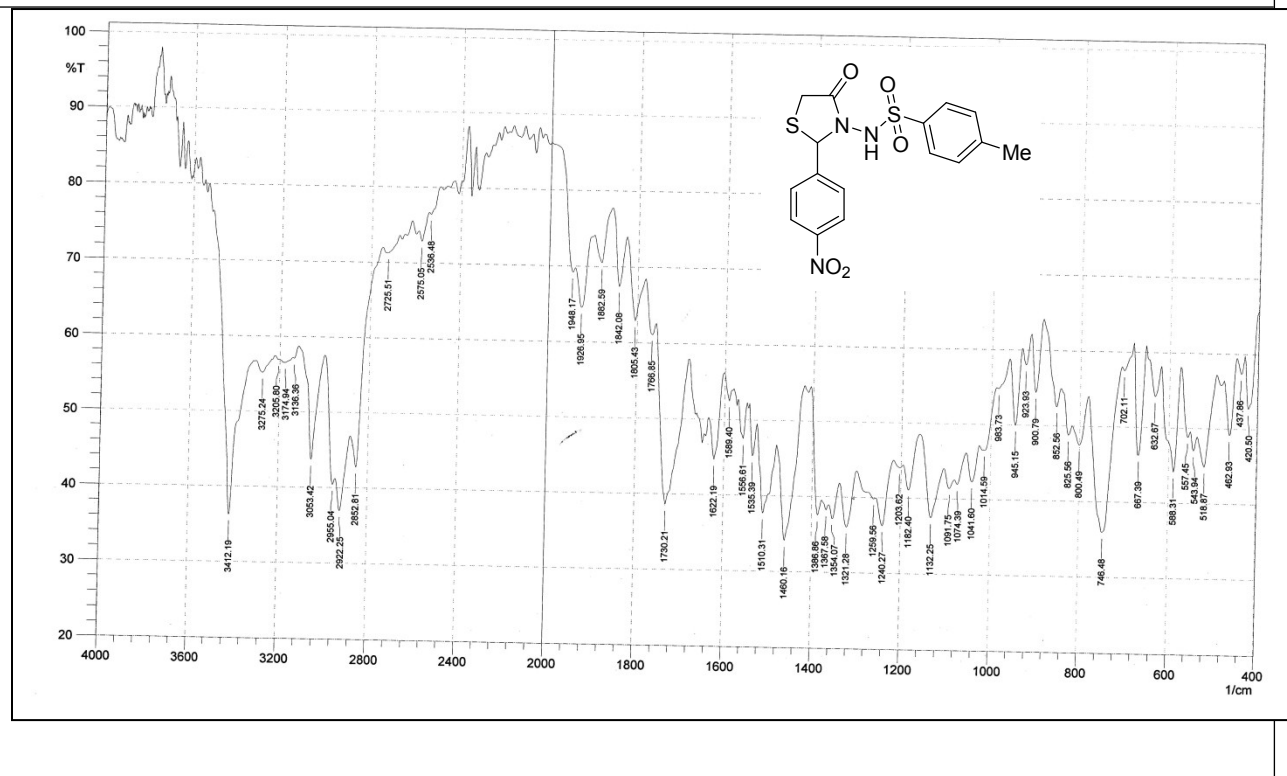

4j. <sup>1</sup>H NMR, 400 MHz, DMSO-d<sub>6</sub>

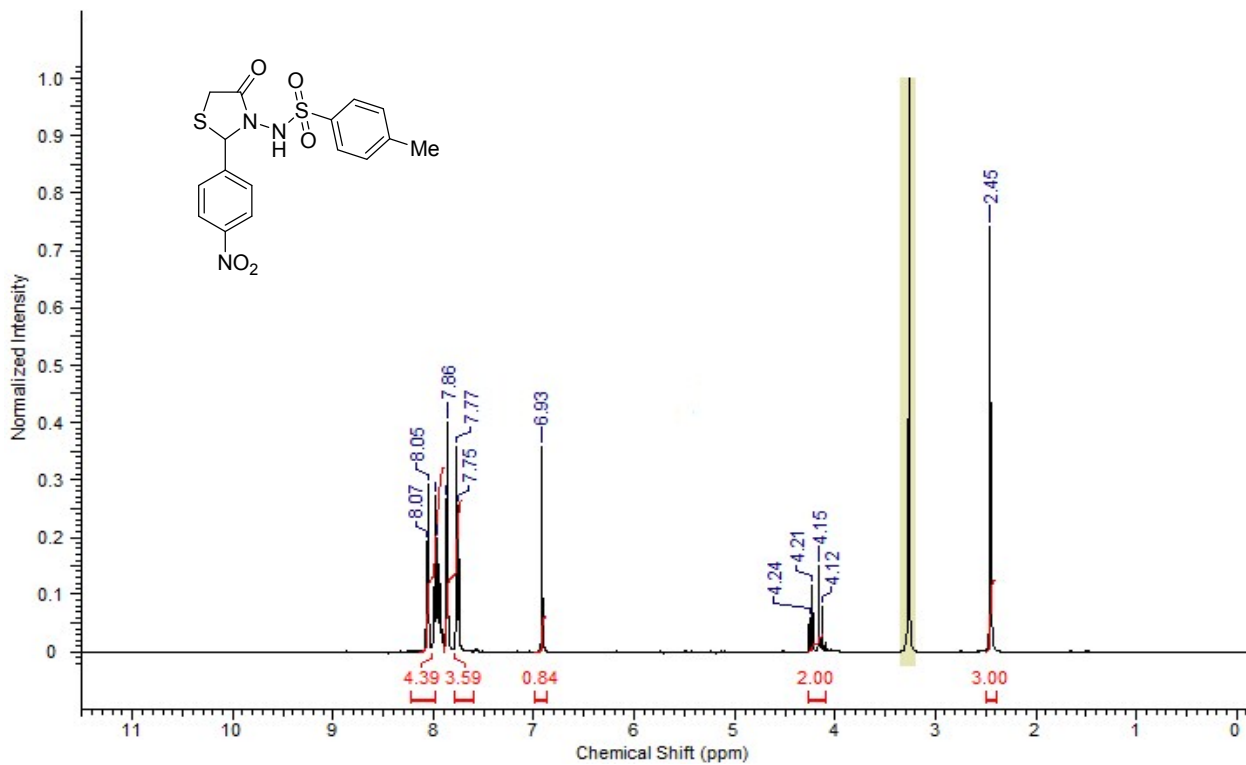

4j. <sup>13</sup>C NMR, 100 MHz, DMSO-d<sub>6</sub>

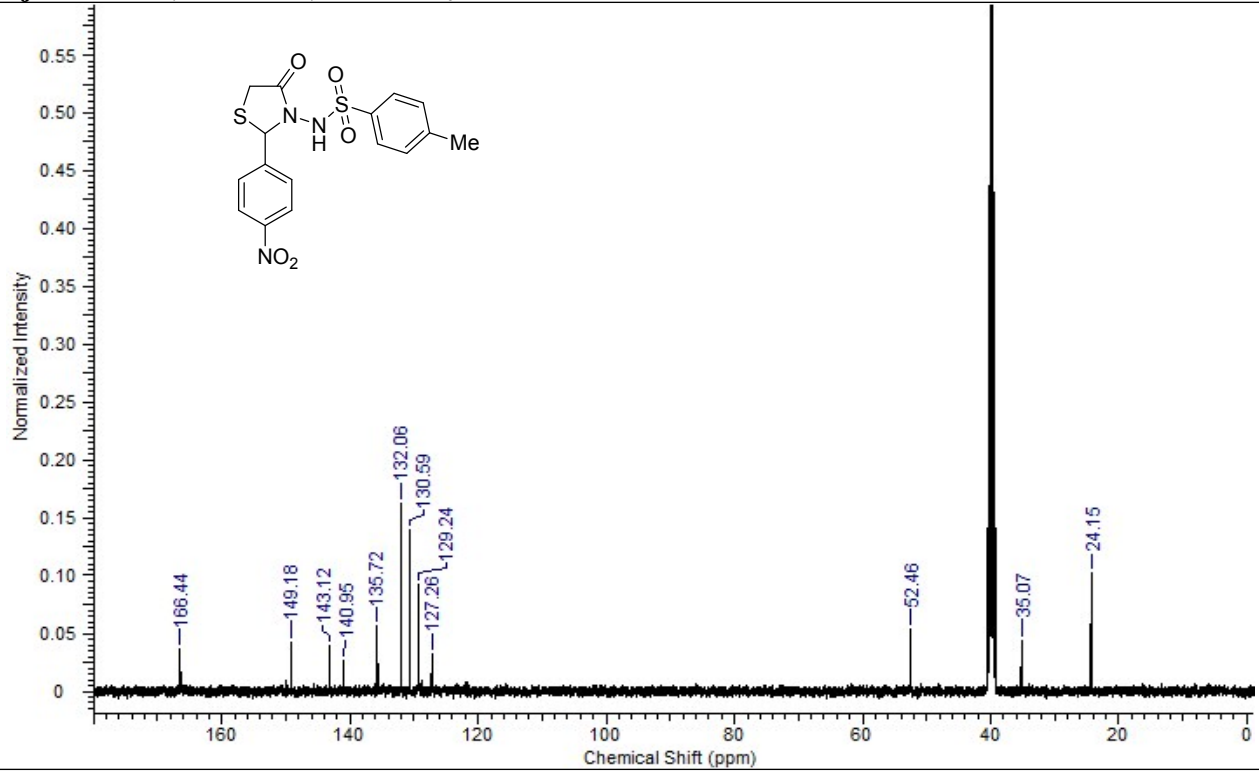

#### 4k. FT-IR

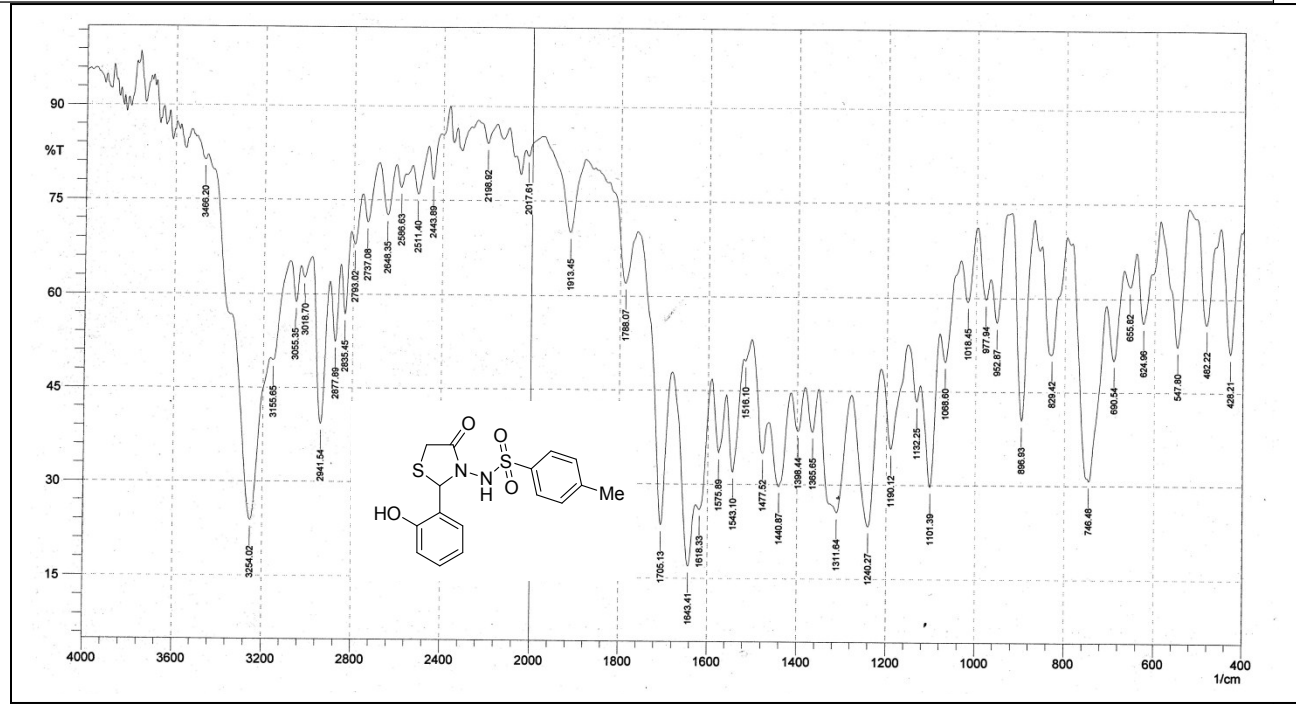

#### 4k. LC-MS

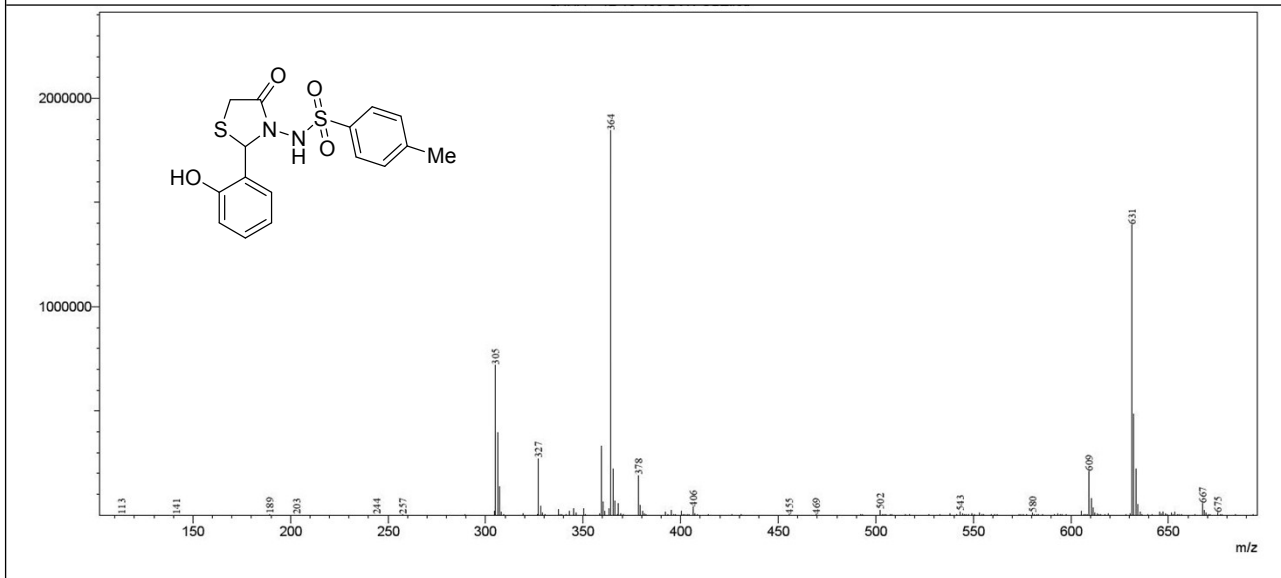

4k. <sup>1</sup>H NMR, 400 MHz, DMSO-d<sub>6</sub>

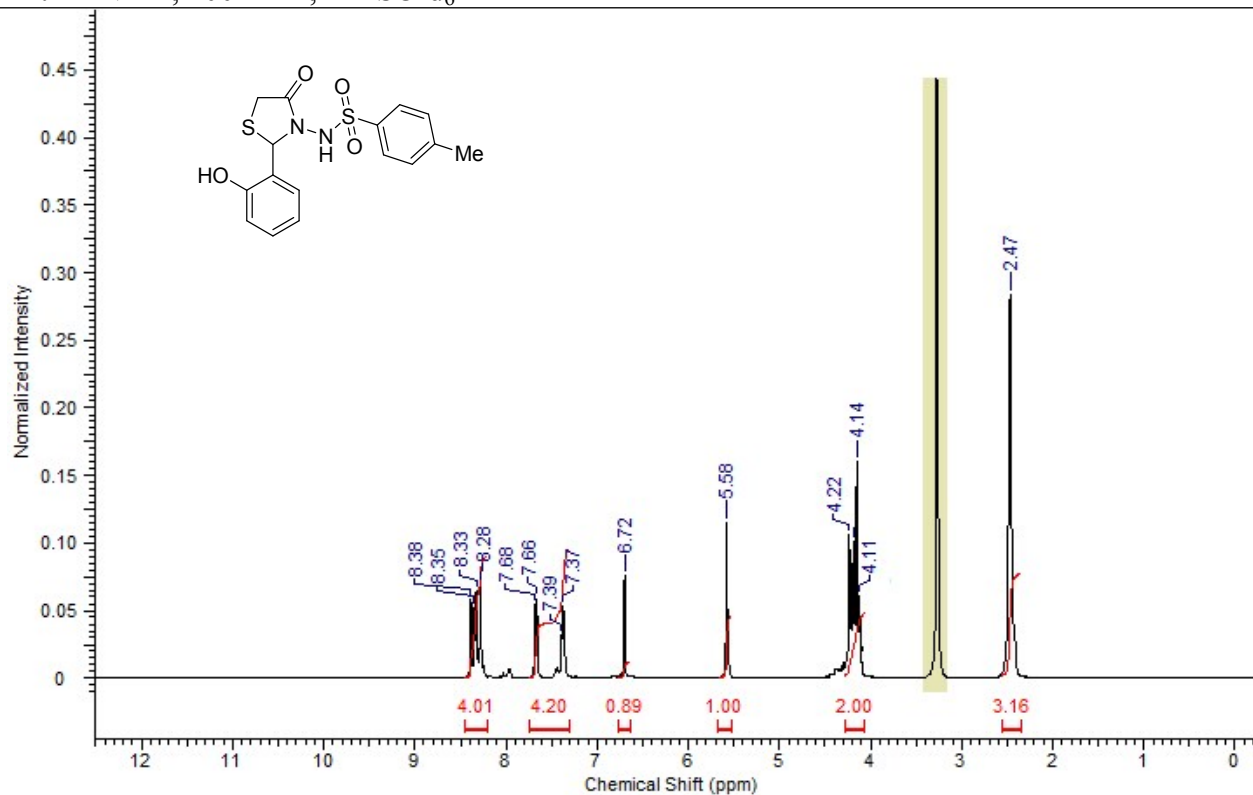

4k. <sup>13</sup>C NMR, 100 MHz, DMSO-d<sub>6</sub>

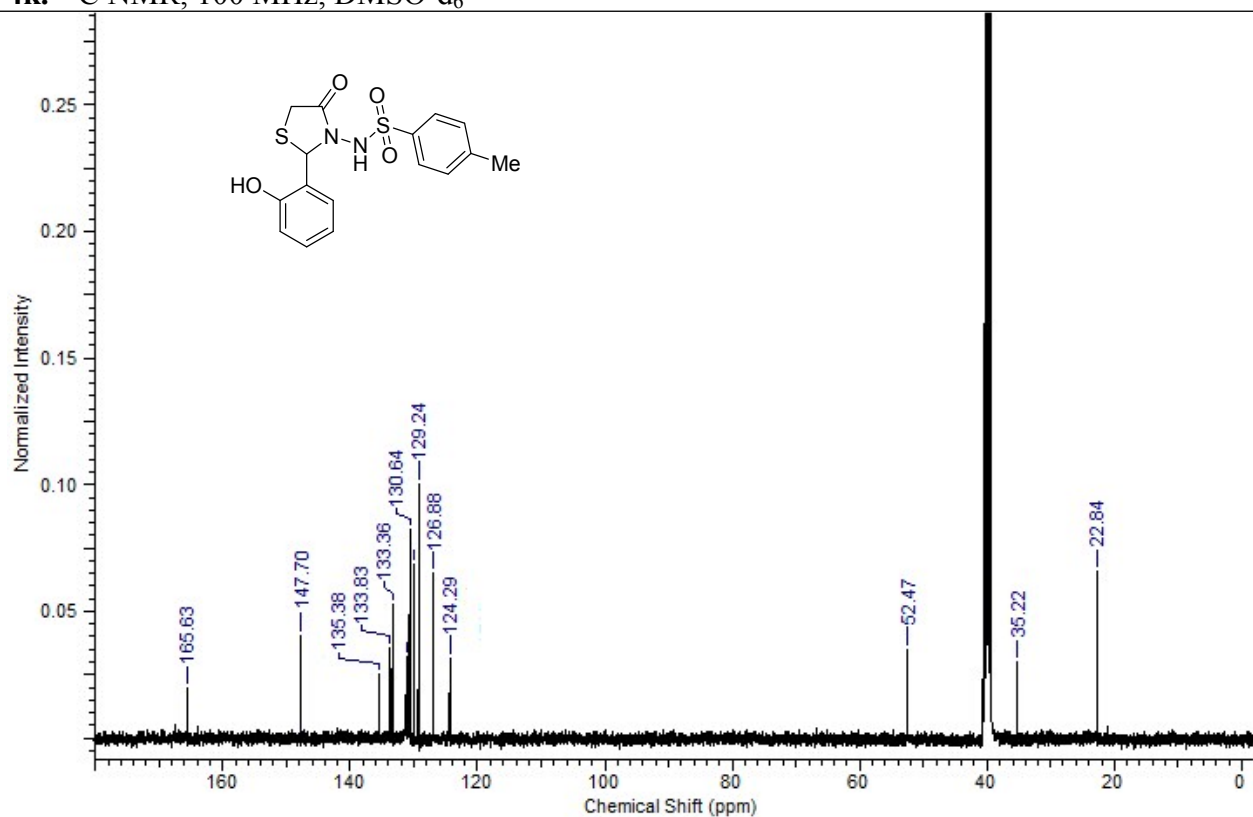

#### 41. FT-IR

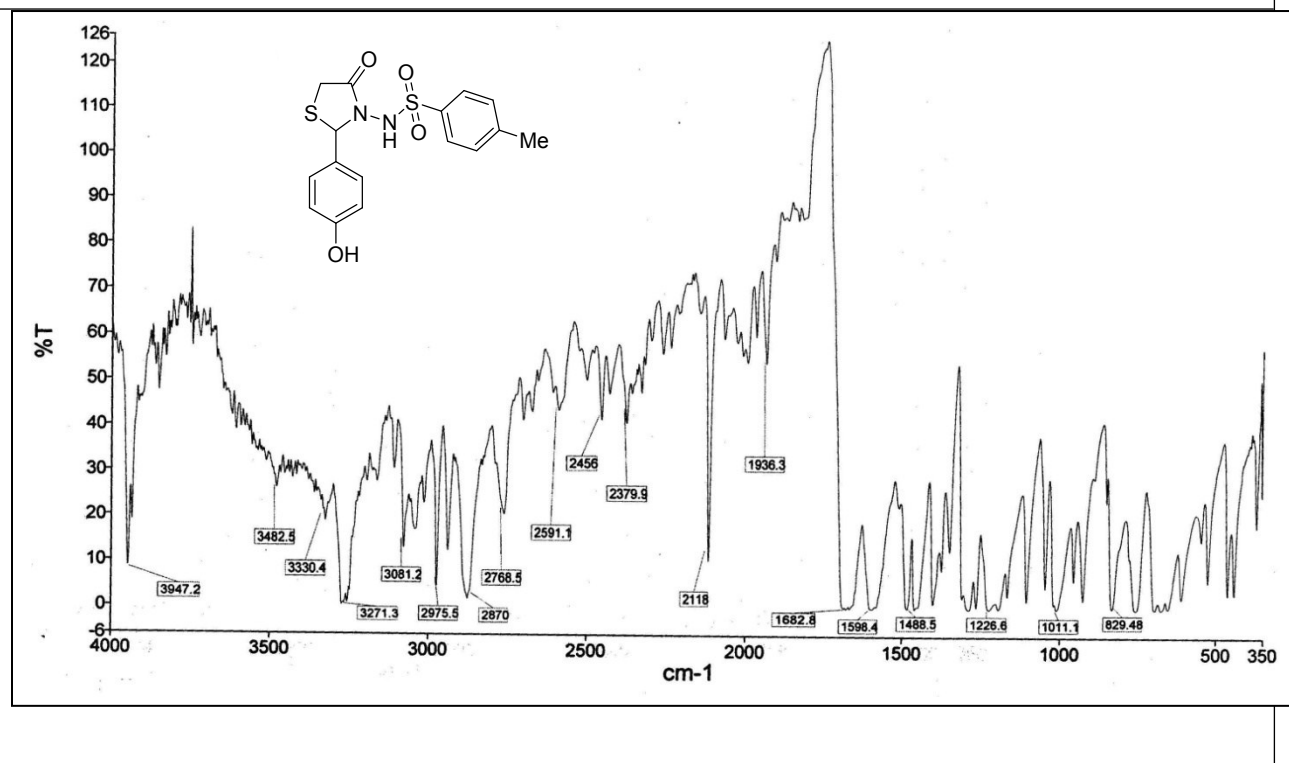

4l. <sup>1</sup>H NMR, 400 MHz, DMSO-d<sub>6</sub>

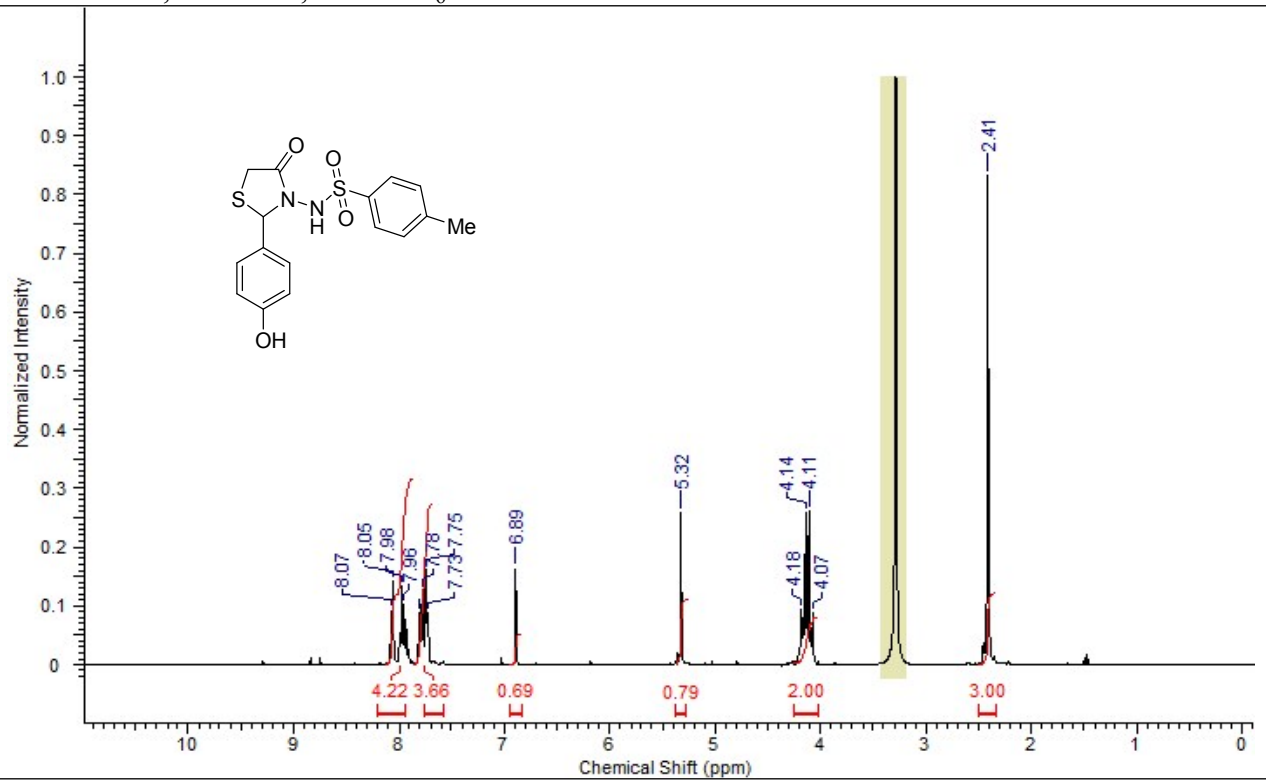

4l. <sup>13</sup>C NMR, 100 MHz, DMSO-d<sub>6</sub>

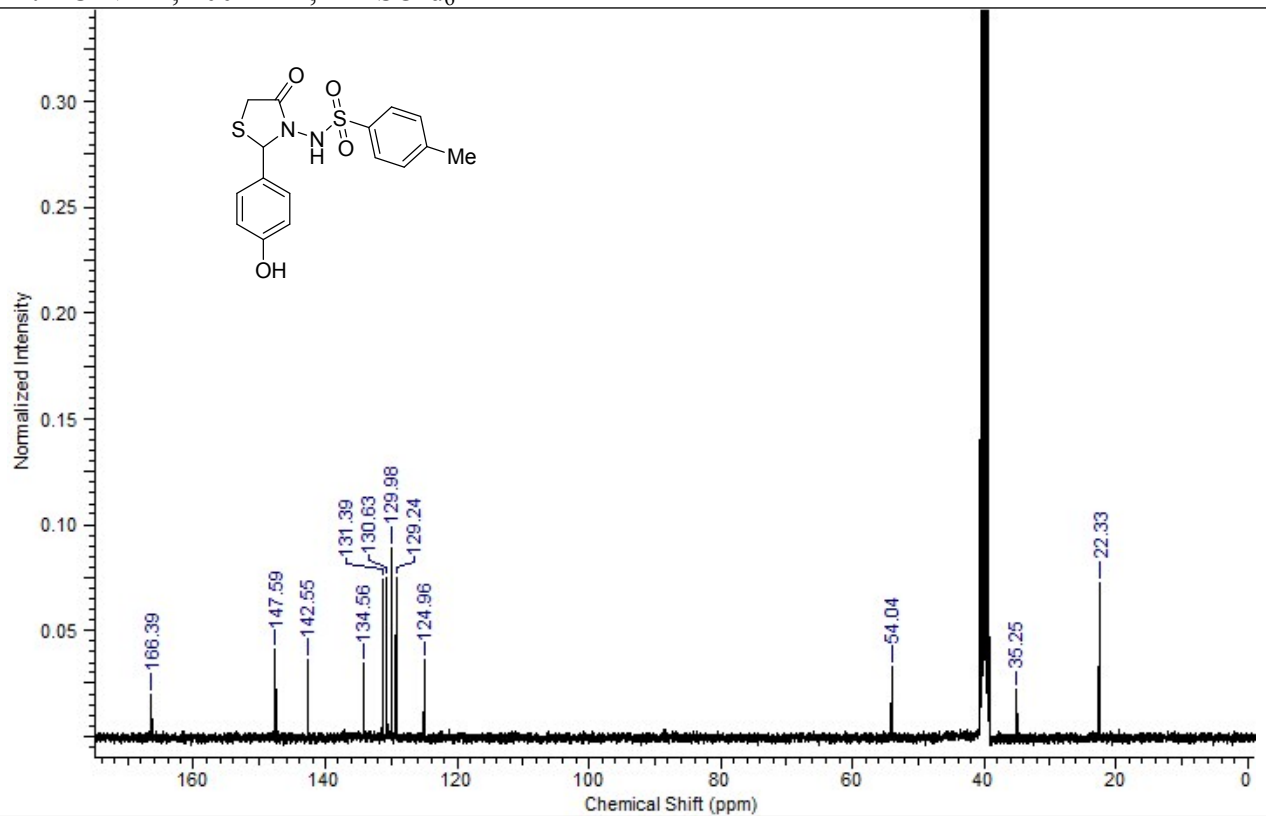

#### 4m. FT-IR

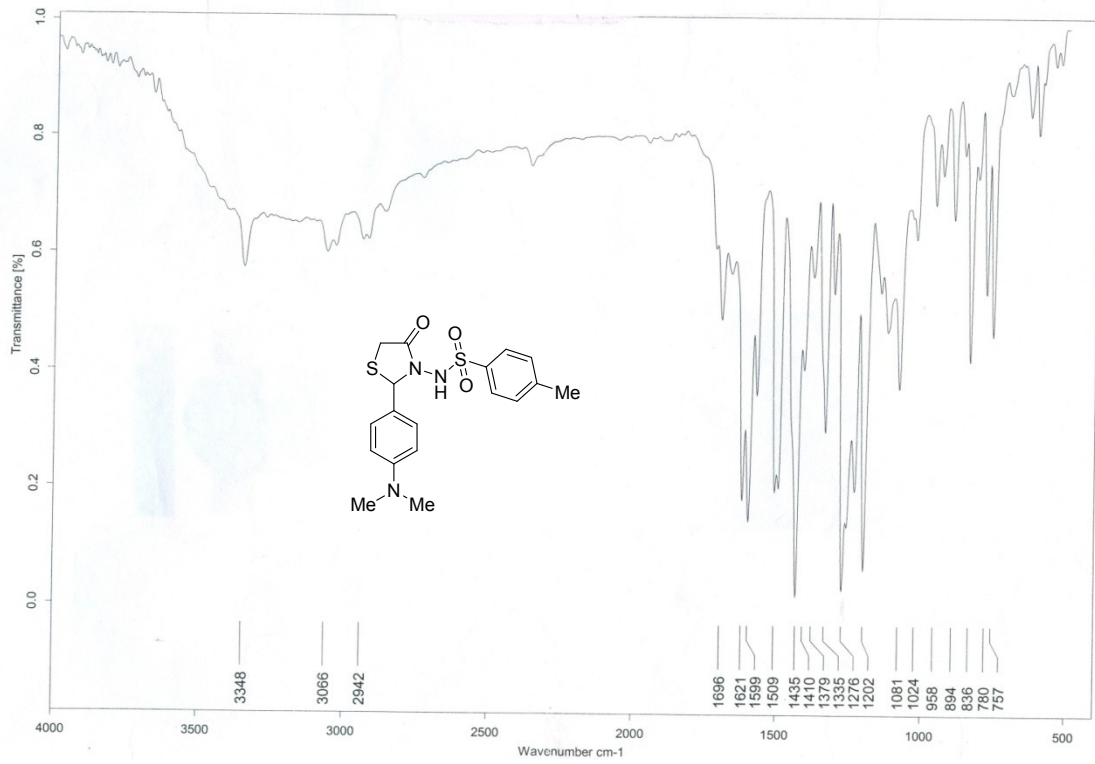

#### 4m. LC-MS

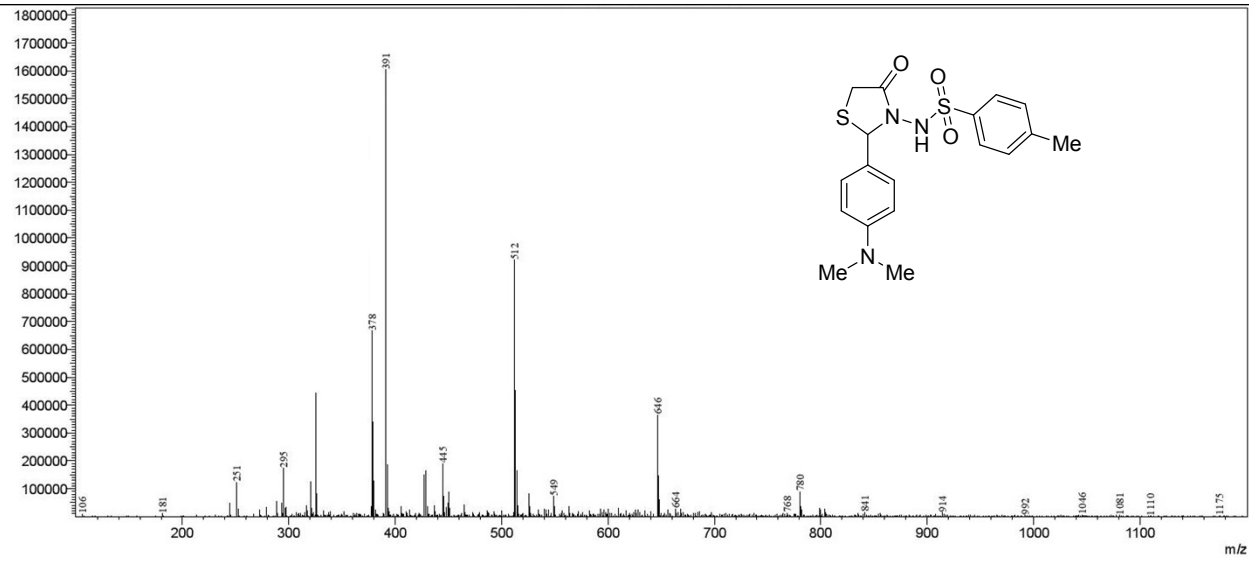

4m. <sup>1</sup>H NMR, 400 MHz, DMSO-d<sub>6</sub>

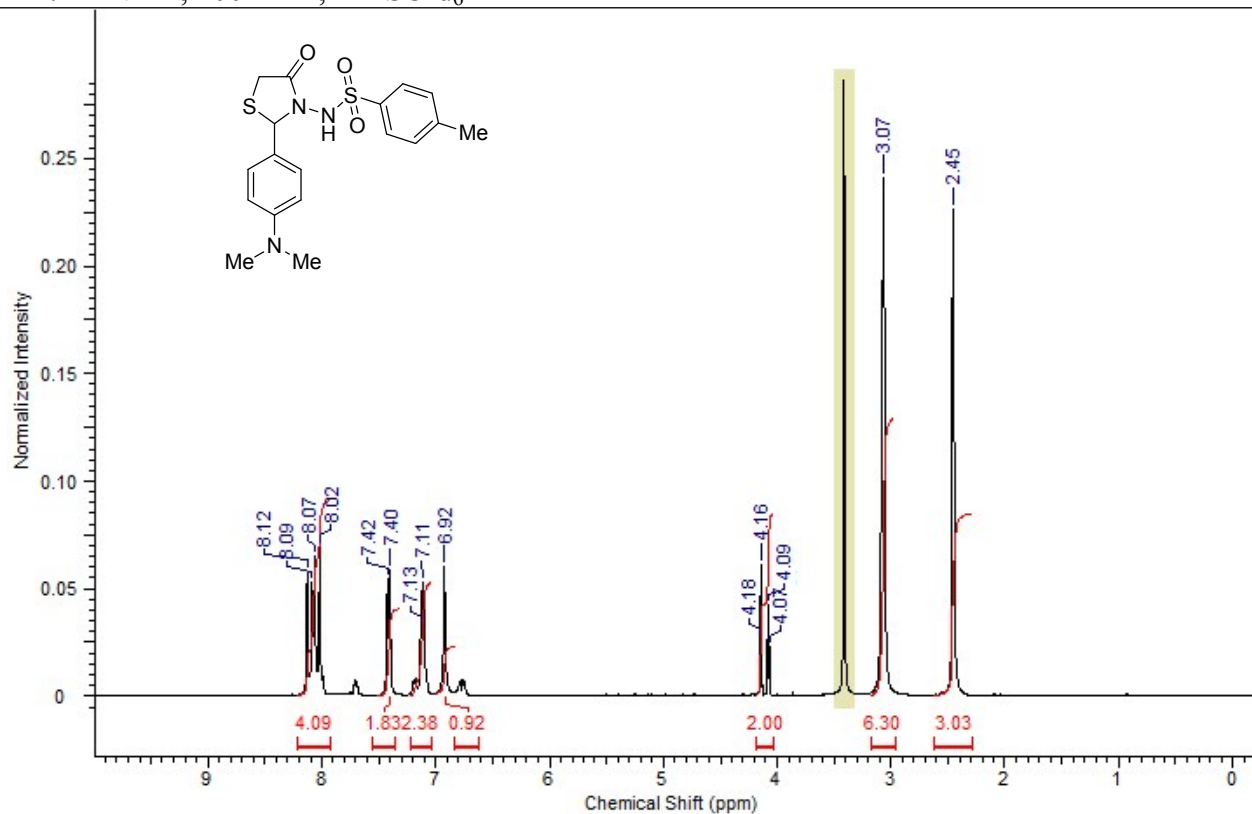

4m. <sup>13</sup>C NMR, 100 MHz, DMSO-d<sub>6</sub>

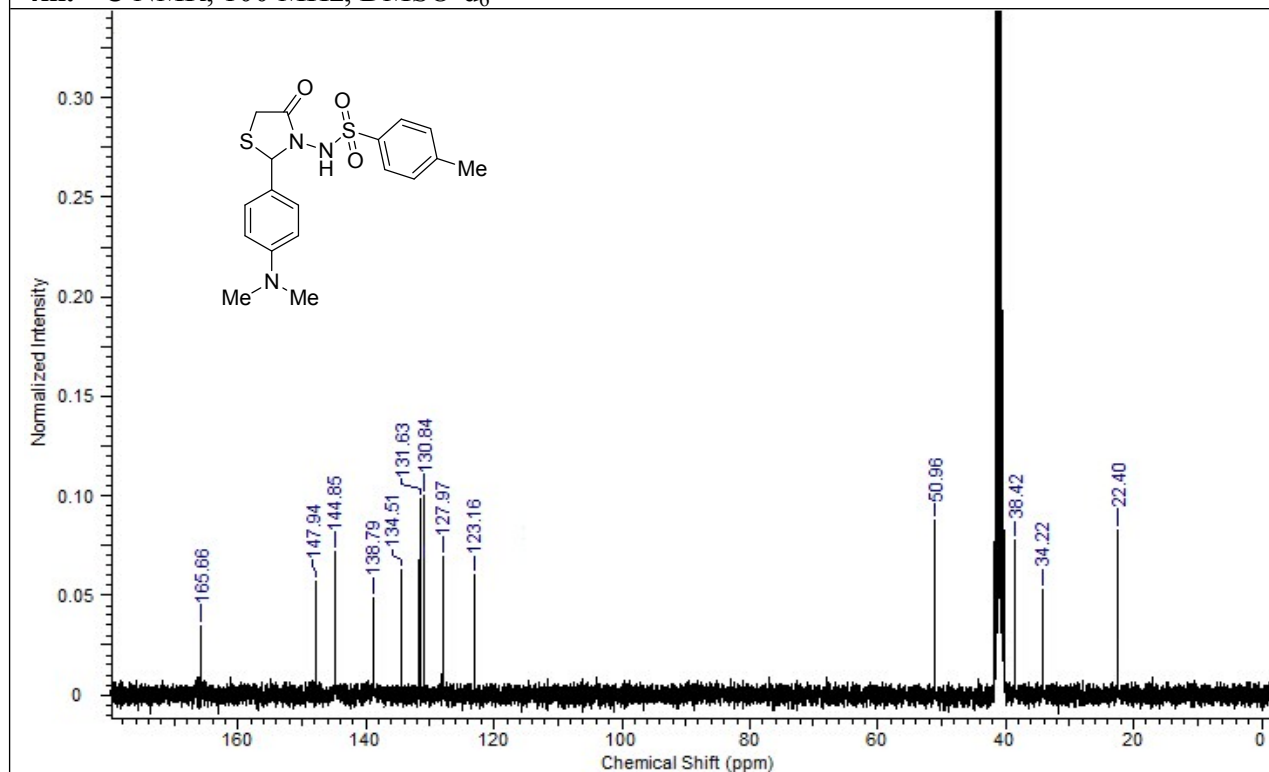

Supplement: c6nj00021e1.pdf [file c6nj00021e1.pdf]
